1 **Tracking neural activity from the same cells during the entire adult life of mice**

2

3 **Authors:** Siyuan Zhao<sup>1,2</sup>, Xin Tang<sup>1,2</sup>, Sebastian Partarrieu<sup>1,2</sup>, Shiqi Guo<sup>1</sup>, Ren Liu<sup>1</sup>, Jaeyong Lee<sup>1</sup>,  
4 Zuwan Lin<sup>1</sup> and Jia Liu<sup>1,\*</sup>

5

6 Affiliations:

7 <sup>1</sup>John A. Paulson School of Engineering and Applied Sciences, Harvard University, Boston, MA  
8 02134 USA

9 <sup>2</sup>These authors contributed equally to this work: Siyuan Zhao, Xin Tang, Sebastian Partarrieu

10 \*e-mail: [jia\\_liu@seas.harvard.edu](mailto:jia_liu@seas.harvard.edu)

11

## 12 **Abstract**

13 Recording the activity of the same neurons over the adult life of an animal is important to  
14 neuroscience research and biomedical applications. Current implantable devices cannot provide  
15 stable recording on this time scale. Here, we introduce a method to precisely implant  
16 nanoelectronics with an open, unfolded mesh structure across multiple brain regions in the mouse.  
17 The open mesh structure forms a stable interwoven structure with the neural network, preventing  
18 probe drifting and showing no immune response and neuron loss during the yearlong implantation.  
19 Using the implanted nanoelectronics, we can track single-unit action potentials from the same  
20 neurons over the entire adult life of mice. Leveraging the stable recordings, we build machine  
21 learning algorithms that enable automated spike sorting, noise rejection, stability validation, and  
22 generate pseudotime analysis, revealing aging-associated evolution of the single-neuron activities.

23 **Main**

24 Long-term stable recording<sup>1-4</sup> of the same neuron at single-cell and single-spike resolution over  
25 the entire adult stage of life of behaving animals is important to understand how neural activity  
26 changes with learning and age<sup>4,5,6,7</sup>, to improve current brain-machine interface performance by  
27 reliably interpreting the brain's behavioral and internal states<sup>4,6</sup>, and to study neurodegenerative  
28 diseases, aging-associated neurological disorders and cognitive decline<sup>7,8</sup>. Current implantable  
29 electronic and optical tools can record neural activity at single-cell and single-spike resolution but  
30 suffer from immune response and recording drift due to the mechanical and structural disparities  
31 between rigid electronic or optical devices and brain tissue<sup>9,10</sup>. Relative shear and repeat motion at  
32 the implanted interface keep changing the relative position between recording devices and  
33 recorded neurons. The proliferation of astrocytes and microglia form a ~100  $\mu\text{m}$  thick glial sheath  
34 that cause the death of neurons and isolate recording devices from neurons. Together, they lead to  
35 chronic instability of recordings. Optical imaging techniques are further limited by the light  
36 penetration depth and three-dimensional (3D) volumetric scanning across the 3D tissue due to  
37 optical aberration and attenuation<sup>11</sup>.

38 Miniaturized flexible electronics such as mesh nanoelectronics and thin-film probes have been  
39 utilized in *in vivo* electrophysiology<sup>12-17</sup> given their unique mechanical properties. Mesh  
40 nanoelectronics provide a chronically stable, gliosis-free implantation over a few months through  
41 the incorporation of tissue-like structural and mechanical properties into nanoelectronics<sup>18-20</sup>.  
42 However, due to their mechanical flexibility, invasive methods such as syringe injection are  
43 required to implant the tissue-like electronics into the brain<sup>18-20</sup>. The relatively large mechanical  
44 damage from the implantation causes permanent damage to the neural network. In addition,  
45 implanted mesh nanoelectronics can only unfold in the cavities of the brain such as the

46 subventricular zone, not in tissue-dense brain regions<sup>18-21</sup>. As a result, the bundled mesh  
47 nanoelectronics do not have the optimized mechanical flexibility required to interface with the  
48 brain tissue over long time periods<sup>18-21</sup>. On the other hand, flexible thin film brain probes lack the  
49 open mesh structures that allow for 3D integration with the neural network<sup>22-24</sup>. They also need to  
50 maintain mechanical strength to prevent damage of the probe during the implantation<sup>22-25</sup>, which  
51 can cause an immune response and probe drifting during long-term implantation. As a result, none  
52 of the existing technologies has demonstrated long-term stable tracking of the same neuron over  
53 the entire adult stage of life of a behaving animal.

54 Here, we solved this issue by implanting a fully unfolded tissue-like mesh nanoelectronics into the  
55 brain of a mouse. The fully unfolded mesh can form an interwoven structure within the neural  
56 network and eliminate the immune response and probe drifting, maintaining a long-term stable  
57 electrode-to-neuron interface at the single-cell level, thus enabling the same neuron to be recorded  
58 over the entire adult life of animals (Fig. 1a). To enable this method, we developed mesh  
59 nanoelectronics monolithically integrated with ultra-thin and releasable polymer shuttles through  
60 lithographic fabrication. We also incorporated unique polymer anchors and water-releasable  
61 structures, allowing for controllable, precise, and minimally invasive delivery of mesh  
62 nanoelectronics in the mouse brain. This implantation method can keep the designed open mesh  
63 structure of the device in the brain across multiple brain regions, including cell-dense regions. The  
64 open mesh allows the neural network to form seamlessly interwoven structures, provides a tissue-  
65 level flexible interface, and prevents the repeated micromotion and drift between recording  
66 electrodes and surrounding neural tissue during yearlong recording, thus allowing for a highly  
67 stable recording of neuron activities across multiple brain regions.



68 By optimizing the size of the implanted nanoelectronics, we achieved stable tracking of the same  
69 neuron over the entire adult life of mice until their natural death (*i.e.*, 5-18 months for mouse #1,  
70 5-20 months for mouse #2, and 5-19 months for mouse #3), confirmed by vigorous statistical  
71 tests<sup>3,18-21,26</sup>. Tracking the whisker-stimulation-evoked single spikes from the barrel cortex  
72 indicated that the electrode embedded in a single whisker barrel does not drift over the animal's  
73 adult life. Using the first several months' recording data to train an autoencoder<sup>27</sup>, a machine  
74 learning (ML) tool for representation learning, we further confirmed the stable recording, which  
75 also allowed for fully automatic spike sorting, noise rejection, and stability analysis over the adult  
76 life of the mice. Finally, ML-based pseudotime analysis of single-unit waveforms identified  
77 several neurons with age-dependent changes in electrical activities.

78

## 79 **Results**

### 80 **Monolithically integrated mesh nanoelectronics and ultra-thin shuttle**

81 To implant completely open and unfolded mesh nanoelectronics into the brain, we integrated the  
82 mesh nanoelectronics monolithically with a releasable, ultra-thin polymeric shuttle using standard  
83 photolithography procedures (Fig. 1b, Extended Data Fig. 1, 2a-k, Methods). The mesh  
84 nanoelectronics were fabricated as described in previous reports<sup>18-20</sup>. Briefly, 16 or 32 15- $\mu\text{m}$ -  
85 diameter electrodes were connected by SU-8 encapsulated Cr/Au interconnects to Cr/Au  
86 input/output (I/O) pads. The encapsulated interconnects were 10- $\mu\text{m}$  wide and <1- $\mu\text{m}$  thick,  
87 forming a mesh network with a 2D filling ratio at 73.3%, which yielded an effective bending  
88 stiffness of  $1.26 \times 10^{-15} \text{ N} \cdot \text{m}^2$ . The mesh nanoelectronics were partially fabricated on the top of a  
89 Ni sacrificial layer. Next, a 25- $\mu\text{m}$ -thick polymer shuttle was defined on the top of the mesh

90 nanoelectronics with a 3- $\mu\text{m}$ -thick water-soluble dextran and 20- $\mu\text{m}$ -thick polymer anchors. These  
91 polymer anchors (Fig. 1b, inset) connected the mesh nanoelectronics with the polymer shuttle  
92 through the dextran layer (Fig. 1b, red box). After the integrated device was released from the  
93 substrate (Fig. 1c, top) by removing the Ni sacrificial layer, the anchor kept the pattern of the mesh  
94 nanoelectronics on the polymer shuttle. Then, a few drops of 10 wt% PEG (35 kDa) was coated to  
95 reinforce the bonding between the mesh nanoelectronics and polymer shuttle (Fig. 1c, bottom), as  
96 well as enhanced the temporary stiffness and provided protection to the mesh nanoelectronics  
97 during implantation. The biodegradable PEG adhesion layer has a sub-micron thickness; thus, the  
98 surgical footprint is mostly affected by the thin polymer shuttle. After removing the anchor  
99 connection (Fig. 1c, bottom), the mesh nanoelectronics can be readily released from the polymer  
100 shuttle by dissolving the PEG in an aqueous solution (Fig. 1d).

101 The polymer shuttle was used to guide the implantation of the mesh nanoelectronics into the brain  
102 tissue (Fig. 1e, left). After the integrated brain probe reached the targeted position, saline was  
103 applied to quickly dissolve the PEG and to release the mesh nanoelectronics from the polymer  
104 shuttle, which was subsequently withdrawn from the brain tissue (Fig. 1e, right). We characterized  
105 the implantation procedure in a transparent 0.6 wt% agarose gel-based brain phantom with  
106 mechanical properties comparable to that of the brain tissue<sup>28</sup>. At a typical implantation speed of  
107 100  $\mu\text{m}/\text{s}$ , we did not observe any buckles on the probes (Fig. 1f, left). After insertion, 1 $\times$   
108 phosphate buffered saline (PBS) solution was applied to dissolve the PEG/dextran adhesive layer.  
109 The shuttle was then withdrawn at a speed of 10  $\mu\text{m}/\text{s}$ . After withdrawing the shuttle, the mesh  
110 nanoelectronics still maintained its implantation location and open mesh structure without any  
111 deformations (Fig. 1f, right). We tested the yield of the implantation in brain phantoms with  
112 various speeds. We achieved a 93.3% yield for insertion and extraction of 16-channel mesh

113 nanoelectronics at 100  $\mu\text{m/s}$  (Extended Data Fig. 2l, m). There was no significant change of  
114 implantation yield with different size mesh electronics of 32 channels ( $n = 3, p > 0.05$ , Extended  
115 Data Fig. 2l, m).

116 The optimized implantation procedure was then used for mouse brain implantation. Figure 1g  
117 shows typical implantation of 300- $\mu\text{m}$ -wide 16-channel mesh nanoelectronics in the anesthetized  
118 mouse brain (Methods). The probe (Fig. 1g, inset) can be easily implanted with the polymer shuttle  
119 withdrawn by the same conditions tested for the phantom gel. Damages to the blood vessels were  
120 minimal throughout the imaging-guided implantation. To evaluate acute tissue damage, cell loss,  
121 and mesh nanoelectronics distribution, we imaged the *post hoc* fixed and stained tissue slices  
122 immediately after implantation (Fig. 1h). Acute damaged area with the thin-shuttle was  
123 approximately  $0.0068 \pm 0.0016 \text{ mm}^2$  (mean  $\pm$  SD,  $n = 5$ , Fig. 1h), which is significantly smaller  
124 than those from previous reported implantations using syringe-injection<sup>18,19</sup> ( $0.0164 \pm 0.0033 \text{ mm}^2$ ,  
125 mean  $\pm$  SD,  $p < 0.01$ ,  $n = 5$ , Fig. 1h) and biodegradable shuttles<sup>21,29</sup> ( $0.0182 \pm 0.0039 \text{ mm}^2$ , mean  
126  $\pm$  SD,  $p < 0.01$ ,  $n = 5$ , Fig. 1h). While the tissue damage showed no significant difference compared  
127 with samples implanted by 50- $\mu\text{m}$  diameter tungsten wire<sup>25</sup> ( $0.0062 \pm 0.0014 \text{ mm}^2$ , mean  $\pm$  SD,  $n$   
128 = 5, Fig. 1h), the cross-sectional images of brain slices with implants showed the clear unfolded  
129 mesh structures vs. bundled ribbons by tungsten probe-based delivery (Fig. 1i). Compared with a  
130 previously demonstrated implantation method for flexible neural probes<sup>18-21,25,29,30</sup>, the integrated  
131 25- $\mu\text{m}$ -thick polymer shuttle drastically reduces tissue displacement during implantation as well  
132 as maintains the designed open structure with nearly 90% implantation yield. Moreover, the  
133 presented method involves minimal manual manipulations since the ultra-flexible nanoelectronics  
134 was pre-attached to the thin-shuttle with the lithography process. On average, it took less than 3  
135 min to assemble one mesh nanoelectronics (more than 20 nanoelectronics per hour), including sub-

136 micro-thick PEG coating, anchor dicing, and additional packaging with a success rate approaching  
137 100%.

138

### 139 **Unfolded mesh nanoelectronics structure 3D interwoven with the neural network.**

140 We implanted mesh nanoelectronics with different sizes across multiple brain regions. Each mesh  
141 structure has an ultra-small cross-section of  $10 \times 1 \mu\text{m}^2$ . The longitudinal bending stiffness of each  
142 individual mesh structure reached  $1.26 \times 10^{-15} \text{ N} \cdot \text{m}^2$ , which is comparable to that of brain tissue and  
143 orders of magnitude lower than *state-of-the-art* probes (*i.e.*, ultrasmall carbon<sup>31-33</sup>, polyimide<sup>34</sup> and  
144 elastomer-based ‘e-dura’ probes<sup>35</sup>). Rhodamine 6G was added to the SU-8 encapsulation layer,  
145 enabling the imaging of the mesh structure in the brain. To explore the potential capability of the  
146 implantation, Figure 2a shows a 2-mm-wide, 3-mm-long mesh nanoelectronics implanted into a  
147 mouse brain across cortex, hippocampus, and thalamus regions. The size of this device can  
148 potentially include 1,024 recording sites through 3D stacking of electrodes<sup>36</sup> (Fig. 2a-d, Methods).  
149 A representative 3D reconstructed image of the mesh nanoelectronics in the brain tissue at 6-week  
150 post-implantation (Fig. 2a) showed the fully unfolded, open mesh structure interweaving with  
151 neurons and astrocytes across multiple brain regions (*i.e.*, cortex, hippocampus, thalamus, etc.). A  
152 slight bending of the mesh suggested that the tissue-like nanoelectronics were flexible within the  
153 tissue. A zoomed-in view of the hippocampus CA1 region (Fig. 2b) shows a smooth distribution  
154 of neurons and astrocytes across the mesh. Notably, neurons in the cell-dense region (hippocampus)  
155 can still penetrate the open mesh structure (Fig. 2c), forming an intertwined tissue-nanoelectronics  
156 interface. Figure 2d shows that the size of the recording electrode (white dashed circles) is  
157 comparable to the size of the soma. The subcellular feature size, tissue-level flexibility, and 3D  
158 interwoven network collectively eliminated the micromotion between the functional electrode and

159 recorded neurons<sup>37</sup>. Additional replications of mesh nanoelectronics with different sizes were  
160 implanted in mouse brains and are shown in Extended Data Fig. 3.

161 Next, we performed longitudinal immunostaining characterizations to assess the distribution of  
162 key cell types around mesh nanoelectronics over the time course of implantation. To demonstrate  
163 that the open mesh structure reduces immune responses during chronic implantation (Fig. 2e, top),  
164 thin-film nanoelectronics with the same dimensions as mesh nanoelectronics were used (Fig. 2e,  
165 bottom) as control and contralaterally implanted in the same mouse brain. The bending stiffness  
166 of the thin film nanoelectronics is only slightly higher than that of the mesh nanoelectronics ( $39.8 \times$   
167  $10^{-15} \text{ N}\cdot\text{m}^2$  vs.  $1.26 \times 10^{-15} \text{ N}\cdot\text{m}^2$ , Methods). The brain tissue was harvested and sliced for  
168 immunostaining 2-, 6-and 12-week, and 1-year post-implantation. Horizontal slices were stained  
169 with cell-type-specific protein markers for imaging of neurons, astrocytes, and microglia  
170 (Extended Data Fig. 4). We quantitatively analyzed horizontal brain slices implanted with 16-  
171 channel, 300- $\mu\text{m}$ -wide film/mesh nanoelectronics (Fig. 2f-i, Methods). Protein marker signals  
172 were calculated by normalizing the fluorescence intensity around the implantation site with the  
173 baseline value defined as the average fluorescence intensity over a range of 525-550  $\mu\text{m}$  away  
174 from the nanoelectronics. Statistical analysis demonstrated a significant degradation of neuron  
175 density (NeuN) and an enhancement of astrocytes and microglia intensity (GFAP and Iba-1,  
176 respectively) near the thin-film nanoelectronics at all time points ( $p < 0.05$ ,  $n = 5$ , Fig. 2f). These  
177 results proved that the thin-film nanoelectronics can still trigger the proliferation of  
178 astrocytes/microglia and reduced the neuron density at the nanoelectronics-brain interface.  
179 Meanwhile, the open mesh nanoelectronics introduced minimal damage to the surrounding  
180 neurons and negligible immune response. Importantly, the result demonstrated that no significant  
181 neuron loss was detected at 2-week post-implantation for mesh samples (Fig. 2f), suggesting

182 minimal acute damage from the thin-polymer shuttle. In addition, the neuron density near the mesh  
183 surface remained the same at one-year post-implantation (Fig. 2f).

184 We further calculated the normalized intensity of neural cell fluorescence signals within regions  
185 100- $\mu\text{m}$  away from the nanoelectronics to assess neuron loss and inflammation reaction at the  
186 different post-implantation periods (Fig. 2g-i). The mesh nanoelectronics samples showed a  
187 neuron density of  $83.9 \pm 13.0\%$  (mean  $\pm$  SD,  $n = 5$ , Fig. 2g) at 2 weeks, which is greater ( $p < 0.001$ ,  
188  $n = 5$ , Fig. 2g) than that from the thin film nanoelectronics ( $66.9 \pm 7.8\%$ , mean  $\pm$  SD, Fig. 2g) in  
189 the contralateral brain slices. Compared to the non-implanted regions, neuron intensity of mesh  
190 nanoelectronics samples increased to  $93.1 \pm 10.2\%$ ,  $99.1 \pm 8.0\%$ , and  $102.4 \pm 11.2\%$  (mean  $\pm$  SD,  
191  $n = 5$ , Fig. 2g) 6 weeks, 12 weeks, and 1-year after implantation, respectively. On the contrary,  
192 thin-film nanoelectronics samples showed significant neuron loss for the same periods ( $70.2 \pm$   
193  $4.6\%$ ,  $84.8 \pm 3.3\%$ , and  $85.2 \pm 2.3\%$  at 6 weeks, 12 weeks, and 1-year after implantation,  
194 respectively.  $p < 0.05$ ,  $n = 5$ , Fig. 2g). The intensity of astrocytes and microglia around the mesh  
195 slightly increased at 2 weeks ( $115.1 \pm 9.1\%$  at microglia,  $132.6 \pm 20.5\%$  at astrocytes, mean  $\pm$  SD,  
196  $n = 5$ , Fig. 2h, i) and then reduced at 6 weeks ( $113.6 \pm 5.8\%$  at microglia,  $110.1 \pm 10.0\%$  at  
197 astrocytes, mean  $\pm$  SD,  $n = 5$ , Fig. 2h, i). Moreover, continuous monitoring of the inflammation  
198 around the mesh nanoelectronics revealed nearly normal immune cell distribution at 12 weeks  
199 ( $95.3 \pm 13.1\%$  at microglia,  $105.5 \pm 12.7\%$  at astrocytes, mean  $\pm$  SD,  $n = 5$ , Fig. 2h, i), and even  
200 up to one year ( $104.9 \pm 9.0\%$  at microglia,  $109.5 \pm 17.9\%$  at astrocytes, mean  $\pm$  SD,  $n = 5$ , Fig. 2h,  
201 i). We attribute the little-to-no immune response of the mesh nanoelectronics to the ultra-flexible  
202 open structure that is imperceptive to surrounding brain tissue, neurons, and the cells involved in  
203 inflammation. Compared with the open mesh structure, the thin-film nanoelectronics implantation  
204 introduced significantly higher levels of astrocytes ( $181.9 \pm 17.9\%$ ,  $272.6 \pm 40.3\%$ ,  $174.4 \pm 22.8\%$

205 and  $182.1 \pm 32.7\%$  at 2-, 6-, 12- and 1-year post-implantation, respectively, mean  $\pm$  SD,  $n = 5$ , Fig.  
206 2h, i) and microglia aggregation ( $177.2 \pm 14.5\%$ ,  $162.3 \pm 18.4\%$ , and  $125.1 \pm 12.6\%$  and  $154.9 \pm$   
207  $30.0\%$  at 2-, 6-, 12- and 1-year post-implantation, respectively. Mean  $\pm$  SD,  $n = 5$ , Fig. 2h, i) over  
208 the same period ( $p < 0.05$ , significant enhancement compared with the open mesh at all time points,  
209 Fig. 2h, i). Notably, we can still observe the proliferation of astrocytes and microglia around the  
210 thin-film nanoelectronics at one year post-implantation. Together, these results demonstrate that  
211 open mesh nanoelectronics introduce little-to-no inflammation and mechanical damage to the  
212 surrounding tissues as compared with thin-film nanoelectronics over yearlong implantation.

213

#### 214 **Long-term stable recording at single-cell resolution across multiple brain regions.**

215 To test the stability of the recording, we implanted 600- $\mu$ m-wide mesh nanoelectronics with 32  
216 channels and 300- $\mu$ m-wide mesh nanoelectronics with 16 channels into multiple mouse brain  
217 regions for head-fixed behaving electrophysiology (Methods). Electrodes were implanted into  
218 different brain regions including the somatosensory cortex and striatum (32-channel, mesh  
219 nanoelectronics#1, Fig. 3a); red nucleus, interstitial nucleus, and ventral tegmental area in  
220 midbrain (32-channel mesh nanoelectronics#2, Fig. 3a); and visual cortex and hippocampus (16-  
221 channel mesh nanoelectronics#3, Fig. 3a). Putative individual neurons were isolated using  
222 *Waveclus*<sup>38</sup> (Methods). Intrinsic spike waveform variability from the superficial (mesh  
223 nanoelectronics #1, #3, Fig. 3b, d) and deep (mesh nanoelectronics #2, Fig. 3c) brain regions is  
224 consistent with different putative neuron types in each brain region<sup>39,40</sup>. Moreover, the  
225 hippocampus recordings show higher neuron yield per electrode ( $2.0 \pm 0.4$  neurons, median  $\pm$  1.5  
226 interquartile range,  $n = 8$ , Fig. 3e), spike amplitude ( $148.146 \pm 77.4$   $\mu$ V, median  $\pm$  1.5 interquartile  
227 range,  $n = 8$ , Fig. 3f) and firing rate ( $17.3 \pm 7.6$  spike/s, median  $\pm$  1.5 interquartile range,  $n = 8$ ,

228 Fig. 3g) as compared to other recorded brain regions (primary somatosensory cortex, striatum,  
229 midbrain, primary visual cortex, Fig. 3e-g).

230 Next, we evaluated the long-term stability of recordings from 32-channel and 16-channel mesh  
231 nanoelectronics from 5 independent animals ( $n = 43$  electrodes from two 32-channel and  $n = 29$   
232 electrodes from three 16-channel mesh nanoelectronics). 72 putative individual neurons from  
233 multiple regions were recorded 10 days post-implantation, which increased to 115 putative  
234 individual neurons after 60 days. Both 16-channel and 32-channel mesh nanoelectronics show low  
235 noise level and high signal to noise ratio (SNR) at 60 days post-implantation in behaving animals  
236 (16-channel:  $9.97 \pm 1.72$   $\mu$ V at noise level,  $12.67 \pm 6.34$  at SNR,  $n = 29$  electrodes; 32-channel:  
237  $9.27 \pm 2.10$   $\mu$ V at noise level,  $13.25 \pm 5.94$  at SNR,  $n = 43$  electrodes, mean  $\pm$  SD). The statistical  
238 results (Fig. 3h-j) showed that the normalized neuron count per electrode, average amplitude, and  
239 SNR of 300- $\mu$ m-wide, 16-channel mesh nanoelectronics increased over the first 30 days of  
240 implantation and then stabilized ( $n = 29$  electrodes from three 16-channel mesh nanoelectronics).  
241 These parameters from the 600- $\mu$ m-wide, 32-channel mesh nanoelectronics stabilized at 50-day  
242 post-implantation, suggesting the potential device size-related effect on the signal stability ( $n = 43$   
243 electrodes from two 32-channel mesh nanoelectronics). These results contrast with reports from  
244 previous brain probes where amplitudes, SNR, and neuron counts degrade weeks after  
245 implantation<sup>3,4,37</sup>, suggesting that the unfolded, open mesh nanoelectronics formed a long-term  
246 stable interface with neurons and tissue.

247

248 **Tracking the same neuron's activity over the entire adult life of mice**



249 Two mice implanted with 16-channel mesh nanoelectronics and one mouse with 32-channel mesh  
250 nanoelectronics were recorded monthly until their natural death (5-18 months for mouse #1, 5-20  
251 months for mouse #2, and 5-19 months for mouse #3).  $82.8 \pm 6.2$  % neurons are stably recorded  
252 (mean  $\pm$  SD, compared to the first recording session). Compared to mice of 5 months with glossy  
253 brown fur, the aged mice of 18-months with mesh electronics implanted exhibited normal and  
254 healthy aging, including weight gain, barbering around the eyes, and thinning and grey fur in the  
255 dorsal back skin<sup>41</sup> (Extended Data Fig. 5a-e). Statistical analysis revealed that there was a  
256 significant increase of gray hairs and a decrease of black hairs in aged mice when compared to the  
257 mature adult mice ( $p < 0.05$ ,  $n = 3$ , Extended Data Fig. 5f). The electrode interfacial impedances  
258 exhibited relatively constant values of  $920.2 \pm 107.2$  k $\Omega$  vs.  $857.2 \pm 85.7$  k $\Omega$  at months 6 vs.18  
259 (mean  $\pm$  SD,  $n = 30$ , Extended Data Fig. 6a), indicating stable electrical and mechanical properties  
260 of the mesh nanoelectronics<sup>42</sup>.

261 We first assessed the stability of the signals by spike sorting and statistical analyses. Spike  
262 waveforms were projected to a 2D embedding space for stability validation by using UMAP-<sup>26</sup>  
263 and PCA-based dimension reduction algorithms. PCA is commonly used to define the number and  
264 stability of recorded single-neuron signals over time<sup>19,20,31</sup>. UMAP is a non-linear ML-based  
265 dimension reduction algorithm that can learn a low-dimensional embedding space to preserve as  
266 much of the local and more of the global data structure than linear dimension reduction algorithms  
267 such as PCA. 26 neurons were isolated across all recording sessions starting from 5 months and  
268 lasting until natural death. The clusters for each sorted spike in both UMAP and PCA embeddings  
269 show nearly constant positions and well separated from each other in the first and second  
270 component plane (UMAP1-UMAP2 and PC1-PC2) through >1-year recordings (Fig. 4a, Extended  
271 Data Fig. 6b, Methods). In addition, the corresponding single-unit waveforms' shapes (Fig. 4b),

272 as well as their firing dynamics (*i.e.*, interspike interval) were stable (Extended Data Fig. 6c,  
273 Methods). Auto-correlation analysis showed that single-unit waveforms were highly similar and  
274 almost indistinguishable to themselves ( $0.90 \pm 0.14$  across all recording sessions from 3 mice,  
275 mean  $\pm$  SD, Fig 4c, Methods). L-ratio<sup>43</sup> and silhouette score<sup>44</sup> analysis (Fig. 4d, Methods)  
276 confirmed good unit separation and accurate identification of individual neurons, demonstrating  
277 that the signals were sufficiently separated to permit isolation of single units. Statistical analysis  
278 on single-unit recording stability examined by five waveform features (amplitude, duration, peak-  
279 trough ratio, repolarization slope, and recovery slope)<sup>40</sup> and signal-to-noise ratio (SNR) showed  
280 that their average values were nearly constant and the majority (79% from 3 mice) of neuron  
281 waveform features did not change significantly over time ( $p > 0.05$  two-sided  $t$  test, Fig. 4e-h,  
282 Methods), demonstrating that the neuron spikes showed consistent characteristic features over time.  
283 Notably, the consistent signal-to-noise ratio (SNR) demonstrated that the electrode-to-cell  
284 interface was not degraded during the entire period (Fig. 4f). Collectively, all these results indicate  
285 that the waveforms were stably recorded from the same neuron over the entire recording period.

286 In addition to recording of spontaneous activity, we validated the stability of recording by  
287 examining the stable recording of whisker stimulation-elicited neuron activities<sup>32,45</sup>. Specifically,  
288 we identified one electrode (electrode A) on the mesh nanoelectronics as being close to a D2 barrel  
289 neuron in primary somatosensory cortex (S1 cortex) by successful recording of the whisker-  
290 stimulation-elicited single-unit spikes (Fig. 4i-l). Recording from stimulation of other whiskers  
291 (*e.g.*, C3) or another electrode (*e.g.*, electrode B that is close to electrode A) away from the D2  
292 barrel field were used as control (Extended Data Fig. 7). We performed the whisker deflection  
293 with a galvanometer-driven stimulation contralateral to the implant (Fig. 4i). A 1 Hz, 900 deg/s  
294 deflection was applied to the targeted whisker (Methods). The raster plot and peri-stimulus time

295 histogram (PSTH) of this single-unit recording showed that the electrode A of the mesh  
296 nanoelectronics can record strong and rapid neuron firing in response to the principal whisker D2  
297 deflection (Fig. 4j). We can record well defined neuron activity and waveforms from 8 months to  
298 16 months (Fig. 4j). Spikes observed from the electrode A with C3 whisker deflection (Extended  
299 Data Fig. 7a-c) or from electrode B with D2 whisker stimulation (Extended Data Fig. 7d-e) showed  
300 no correlation with the whisker stimulation. Notably, Figure 4k and l showed that the evoked spike  
301 count and the time delay to the stimulation exhibited no significant change over time ( $p > 0.05$ ,  $n$   
302 = 5). These behavior-triggered electrical activities further demonstrated the capability of this  
303 method to track the same neuron during the adult lifetime of mice.

304

### 305 **ML-based validation and analysis**

306 We further applied an unbiased, autoencoder-based<sup>27</sup> automated neuronal signal processing and  
307 analysis to benchmark the stability of the signal. Autoencoders is a self-supervised learning  
308 algorithm, which is only able to meaningfully reconstruct data similar to what they have been  
309 trained on, thus providing an unbiased way to examine the stability of the recording. We trained  
310 three two-headed autoencoders by using detected spike waveforms, corresponding electrode  
311 information and sorted neuron labels from the first 6-month recording data of the three mice. Each  
312 autoencoder i) learned nonlinear dimension reduction transformations compressing spike  
313 waveforms into a 2D embedding space, ii) classified the spike as a specific neuron in the training  
314 data, and iii) reconstructed the embeddings back to the input data space (Fig. 5a). The classification  
315 and reconstruction were simultaneously optimized during the training of the autoencoder, enabling  
316 the autoencoder the capabilities of spike sorting, postprocessing, and stability verification  
317 (Extended Data Fig. 8a, Methods) at the same time. Notably, the autoencoder showed much faster

318 classification speed and higher reconstruction accuracy compared with UMAP and random forest<sup>46</sup>  
319 classifier-based spike sorting (Extended Data Fig. 8b, Methods). While we used the autoencoder  
320 trained with the first six-month recording to achieve the best performance, we found that a two-  
321 month recording dataset is sufficient to train the model with only about 4% accuracy decrease  
322 (Extended Data Fig. 8c). The waveforms of the remaining 8-month recording data can still be  
323 classified and reconstructed (Fig. 5b and Extended Data Fig. 8d) with the classification accuracy  
324 (Fig. 5c, Extended Data Fig. 8e) reaching  $89 \pm 4\%$  (mean  $\pm$  SD,  $n = 3$  mice). An anomaly dataset  
325 was constructed to simulate the drift of the recording using spikes gathered from a fourth  
326 independent mouse to test the drift detection ability of the autoencoder. The results showed that  
327 the mean squared error (MSE) between reconstructed and original waveforms (Fig. 5d) was higher  
328 for spikes detected from simulated drifting neurons, compared to the stable neurons used in the  
329 training and testing dataset. This significant difference allowed for drift detection based on  
330 reconstruction accuracy. A threshold could be used to distinguish the testing spikes and drifting  
331 spikes, which eliminated the majority of spikes from the drifting dataset ( $83 \pm 12\%$ , mean  $\pm$  SD,  $n$   
332  $= 3$  mice) and kept most spikes from the testing dataset ( $86 \pm 7\%$ , mean  $\pm$  SD,  $n = 3$  mice, Extended  
333 Data Fig. 8f). By visualizing the autoencoders' embedding space in the bottleneck (Fig. 5e), cluster  
334 embeddings of the neuron spike waveforms from the same mouse showed higher separability than  
335 drifting spikes from a different mouse (Extended Data Fig. 8g-k). Furthermore, the training  
336 manifold convex hull was used as a stability verification tool for spike processing to quantify the  
337 within-boundary subset of testing dataset spikes (Fig. 5f and Extended Data Fig. 8h-k). Low  
338 amounts ( $8 \pm 11\%$ , mean  $\pm$  SD,  $n = 3$  mice) of out-of-manifold testing spike embeddings further  
339 demonstrated recording stability as a similarity in waveform shape between the first and last  
340 recording months, meaning the later spikes' embeddings lay within the embedding space created

341 by the first recorded spikes (Fig. 5f and Extended Data Fig. 8h-k). Collectively, high classification  
342 accuracy and low out-of-manifold percentage confirmed the long-term stable single-unit spike  
343 detected from the same neurons over time. This result also suggests that the stable recording data  
344 can be used to build the ML model to perform automated spike sorting based on the first few  
345 months of recording from a given mouse by capturing single-neuron waveform salient  
346 characteristics used as the input to the classification head. Additionally, the ML model successfully  
347 detected the spikes from a different mouse, highlighting the model's ability to detect the drift of  
348 recording.

349

### 350 **Entire adult life study of brain aging at the single-neuron level**

351 The adult mice life recording offers an opportunity to observe aging-associated electrical behavior  
352 changes at single-neuron resolution. We performed both qualitative and quantitative analyses of  
353 aging-associated changes at the single-neuron level over the mouse adult life. Analysis of clusters  
354 using PCA showed the stability of spikes from a group of neurons with largely overlapping clusters  
355 (purple and red, respectively) from each electrode, while the other spikes (green and blue) from  
356 the same electrode showed a slight change over the time course of recording (Fig. 6a). We  
357 quantitatively assessed the multivariate spread of cluster centroid positions by comparing average  
358 position shifts between consecutive cluster centroid positions (Fig. 6a, Methods) to average cluster  
359 distribution spreads. This assessment supported the stability ( $0.47 \sigma_{\text{purple}}$ ,  $0.58 \sigma_{\text{red}}$ ) and variability  
360 ( $1.96 \sigma_{\text{green}}$ ,  $2.63 \sigma_{\text{blue}}$ ) described previously. We analyzed the time-evolution of average neuron  
361 waveforms in a representative 3D feature space while calculating trajectories with a B-spline  
362 interpolation of successive positions (Fig. 6b, Methods). Non-correlated features were chosen after  
363 performing correlation analysis (duration, peak-trough ratio, and repolarization slope in Extended

364 Data Fig. 9a). 21% of neurons (*i.e.*, green and blue) showed a clear trajectories trend while others  
365 (*i.e.*, purple and red) remained the same over the aging of the mice (Fig. 6b, Methods). We  
366 analyzed the time-evolution of the UMAP embeddings of spike waveforms (Fig. 6c, Extended  
367 Data Fig. 9b) in real time and ML-defined pseudotime<sup>47</sup>. To study the continuous and gradual  
368 transition of the neuron waveforms instead of the discrete real time label, we constructed a pseudo-  
369 temporal path termed as pseudotime to order spikes in the latent space using *monocle3*<sup>47</sup>, an ML  
370 tool originally for exploring the dynamics of gene expression within cell types and trajectories  
371 over time (Methods). The pseudotime of stable neurons (red and purple) remained the same value  
372 as the real time varied, which further validated the stability in the waveform during the aging-long  
373 recording. Similarly, the pseudotime of previously defined slow aging-associated neurons  
374 increased as the mouse got old. These qualitative and quantitative results suggest that the long-  
375 term stable recording from these open mesh nanoelectronics can track the aging-related electrical  
376 activity evolution from the same or same group of neurons in mice at single-cell level.

377

## 378 **Conclusion**

379 We demonstrated that the ultra-thin shuttle monolithically integrated mesh nanoelectronics can be  
380 implanted across multiple brain regions with an open mesh structure with minimal tissue damage.  
381 The open mesh structure is interwoven with the neural network in the brain of the animal, enabling  
382 immune response-free implantation and long-term stable 3D electrode-to-neuron integration. This  
383 structural stability allowed us to track the activity of the same neuron over the entire adult life of  
384 mice until natural death as supported by our extensive statistical data analyses showing stable  
385 impedance, waveform, firing dynamics, and recording performance, something not achieved by  
386 other *state-of-the-art* electrodes. We leveraged the high recording stability of this method, capable

387 of successfully training an autoencoder using the first month's recording, which further validate  
388 the stability of recording. Combining the stable recording and autoencoder, we can automate spike  
389 processing, sorting and stability verification on the remaining months' recording. The unique  
390 ability to successfully track individual neurons in a chronically stable manner over such a long  
391 timespan provides a continuous view of aging-associated changes in neural activity. Combining  
392 the evolution of spiking activity at both real time and ML-calculated pseudotime, we observed  
393 potential aging-associated waveform changes at the single-neuron level. We believe long-term  
394 stable tracking of single neuron activity patterns across a stably recorded population of cells  
395 combined with automated data analysis tools will open new opportunities for the next-generation  
396 brain-machine interface and bioelectronic medicine. This technology also promises to inform our  
397 understanding of many long-term processes, including development, learning, recovery from  
398 injury, neurodegeneration and age-related cognitive decline. In the future, we envision that further  
399 integration of stretchability into our current device design, which can further adapt to the large  
400 volume change during early brain development, could further allow us to achieve the long-term  
401 stable recording over the entire lifespan of animals.

402



403 **Figures and Figure Legends**

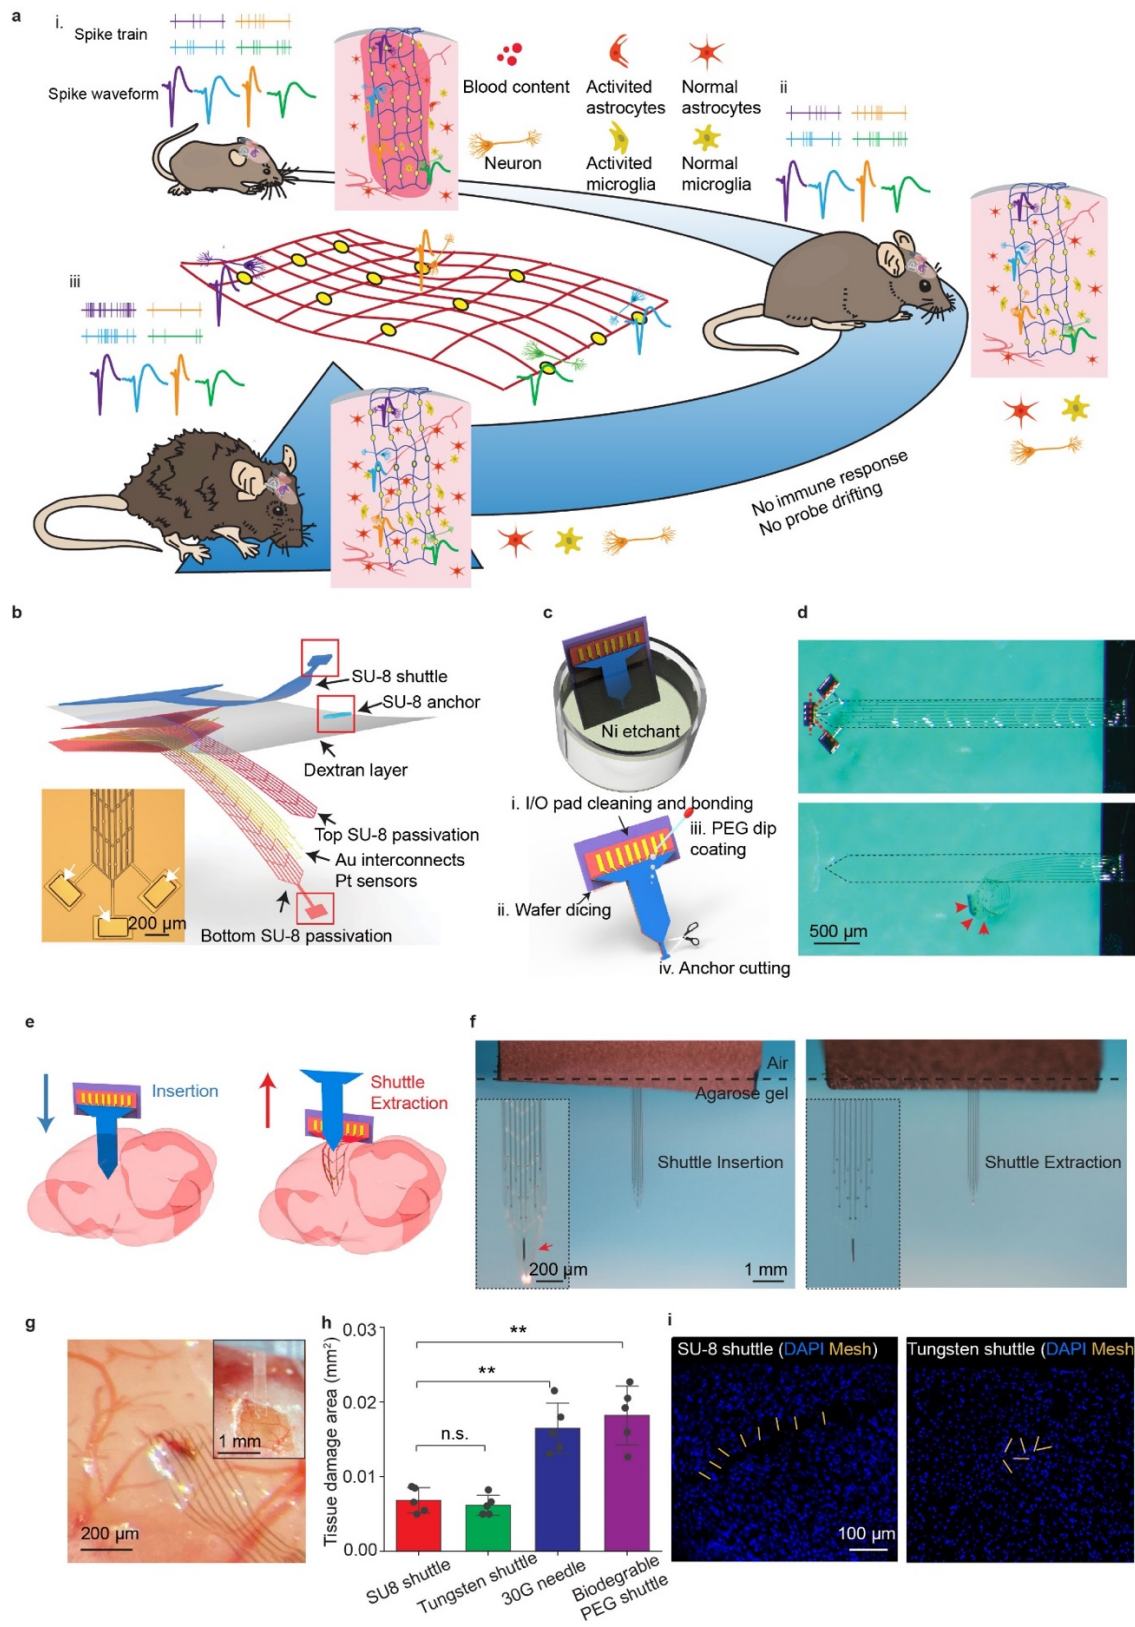

404



405 **Fig. 1 | Minimally invasive implantation of tissue-level flexible mesh nanoelectronics in the**  
406 **brain. a**, Schematics showing the long-term stable electrical recording of the same neuron over  
407 the entire adult life of mice enabled by the minimally invasively implanted and fully unfolded  
408 tissue-level flexible mesh nanoelectronics. Mesh nanoelectronics seamlessly integrate with neural  
409 networks without immune response. Single-cell electrophysiology from the same animal at (i)  
410 mature adult (3-6 months), (ii) middle (10-14 months), and (iii) old (18-24 months) stages are  
411 recorded. Colored waveforms represent different neurons that are stably recorded over the entire  
412 adult life of mice. **b**, Exploded view of the integrated mesh nanoelectronics showing the distinct  
413 material layers. The fully assembled nanoelectronics consisting of (from top to bottom) a 25- $\mu$ m-  
414 thick polymer shuttle, a 20- $\mu$ m-thick polymer anchor, a 3- $\mu$ m-thick dextran dissolvable layer, a  
415 450-nm-thick top SU-8 encapsulation layer, 50-nm-thick platinum electrodes and 70-nm-thick  
416 gold (Au) interconnects, and a 450-nm-thick bottom SU-8 encapsulation layer. Inset: bright-field  
417 (BF) microscopic image of mesh nanoelectronics connected with polymer shuttle through anchors  
418 (white arrows). **c**, Schematics showing stepwise releasing of mesh nanoelectronics from the  
419 substrate and shuttle. Mesh nanoelectronics was released from the fabrication substrate after  
420 removing the Ni sacrificial layer while connected with the polymer shuttle by the anchors (top).  
421 The released shuttle/nanoelectronics were cleaned for bonding and dicing, and then coated by the  
422 biodegradable PEG through dip-coating. After cutting the polymer anchors, the mesh  
423 nanoelectronics was released from the shuttle by dissolving PEG (bottom). **d**, Photographs  
424 showing the released polymer shuttle/mesh nanoelectronics hybrid from the substrate (top) and  
425 released mesh nanoelectronics from the shuttle (bottom). Red dashed lines and arrows highlight  
426 the cutting lines of the anchors and the released mesh nanoelectronics, respectively. **e**, Schematics  
427 showing the brain implantation process. **f**, *In vitro* images of mesh nanoelectronics implantation  
428 in a 0.6% agarose gel. Insets: zoom-in images showing the released mesh nanoelectronics maintain  
429 the unfolded structure and implantation location after withdrawing the polymer shuttle. **g**,  
430 Photograph showing the representative brain implantation with minimal tissue damage. Inset:  
431 ultrathin polymer shuttle-enabled implantation. **h**, Statistical analysis of tissue acute damage zone  
432 of different implantation methods. Data represented as mean  $\pm$  SD, individual data points are  
433 overlaid (\*\* $p < 0.01$ , two-tailed unpaired  $t$  test,  $n = 5$ ). **i**, Representative images of 20- $\mu$ m-thick  
434 horizontal brain slices showing the acute mechanical injuries by the ultrathin-polymer shuttle (left)  
435 and 50- $\mu$ m diameter tungsten shuttle (right). Yellow and blue represent mesh nanoelectronics and  
436 DAPI, respectively.

437

438

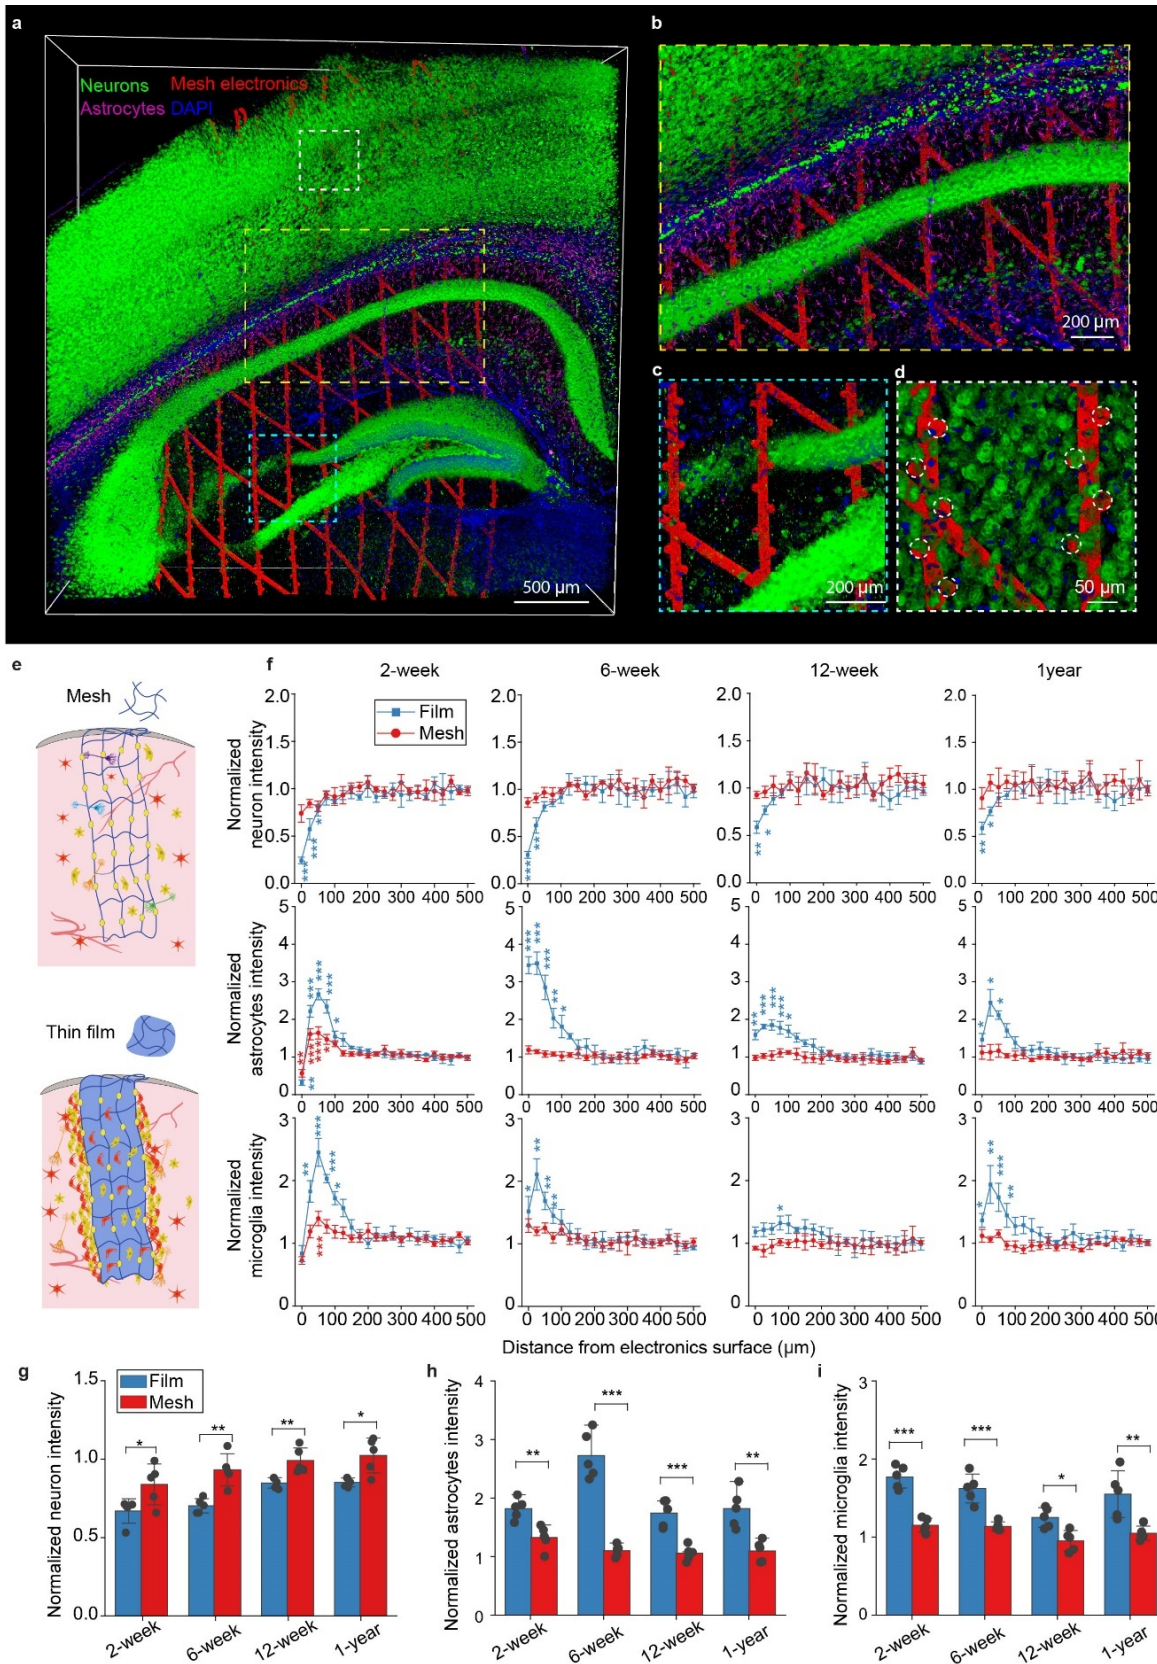

440 **Fig. 2 | Unfolded mesh nanoelectronics seamlessly integrating with the neuron network**  
441 **across multiple brain regions. a**, Representative 3D reconstructed confocal fluorescence imaging  
442 of 600- $\mu\text{m}$ -thick brain tissue implanted with 2-mm wide mesh nanoelectronics for 6 weeks. Green,  
443 purple, blue, and red label neurons, astrocytes, nuclei, and mesh nanoelectronics. **b-d**, Zoom-in  
444 views of the regions highlighted by white (**b**), cyan (**c**), and yellow (**d**) dashed boxes in (**a**),  
445 showing the seamless integration of the mesh with the neural network. Neuron-like electrodes are  
446 highlighted by white dashed circles in (**d**). **e**, Schematics illustrating 1- $\mu\text{m}$ -thick mesh (top) and  
447 thin-film (bottom) nanoelectronics implanted and unfolded inside brain tissue for the long-term  
448 immune response characterization. **f**, Normalized fluorescence intensity as a function of distance  
449 from the mesh/thin-film electronic and tissue boundary at 2 weeks, 6 weeks, 12 weeks, and 1-year  
450 post-implantation. The relative signal was obtained by normalizing the fluorescence intensity with  
451 the baseline value defined as the fluorescence intensity over a range of 525–550  $\mu\text{m}$  away from  
452 the electronics. Data represented as mean  $\pm$  SEM (intensity compared with that of distance at 500-  
453  $\mu\text{m}$ ,  $*p < 0.05$ ,  $**p < 0.01$ ,  $***p < 0.001$ , two-tailed unpaired  $t$  test,  $n = 5$ ). **g-i**, Normalized neuron  
454 (**g**), astrocytes (**h**), and microglia (**i**) intensity and neuron density within 100- $\mu\text{m}$  from the  
455 electronic surface. Data represented as mean  $\pm$  SD, individual data points are overlaid ( $*p < 0.05$ ,  
456  $**p < 0.01$ ,  $***p < 0.001$ , two-tailed unpaired  $t$  test,  $n = 5$ ).  
457



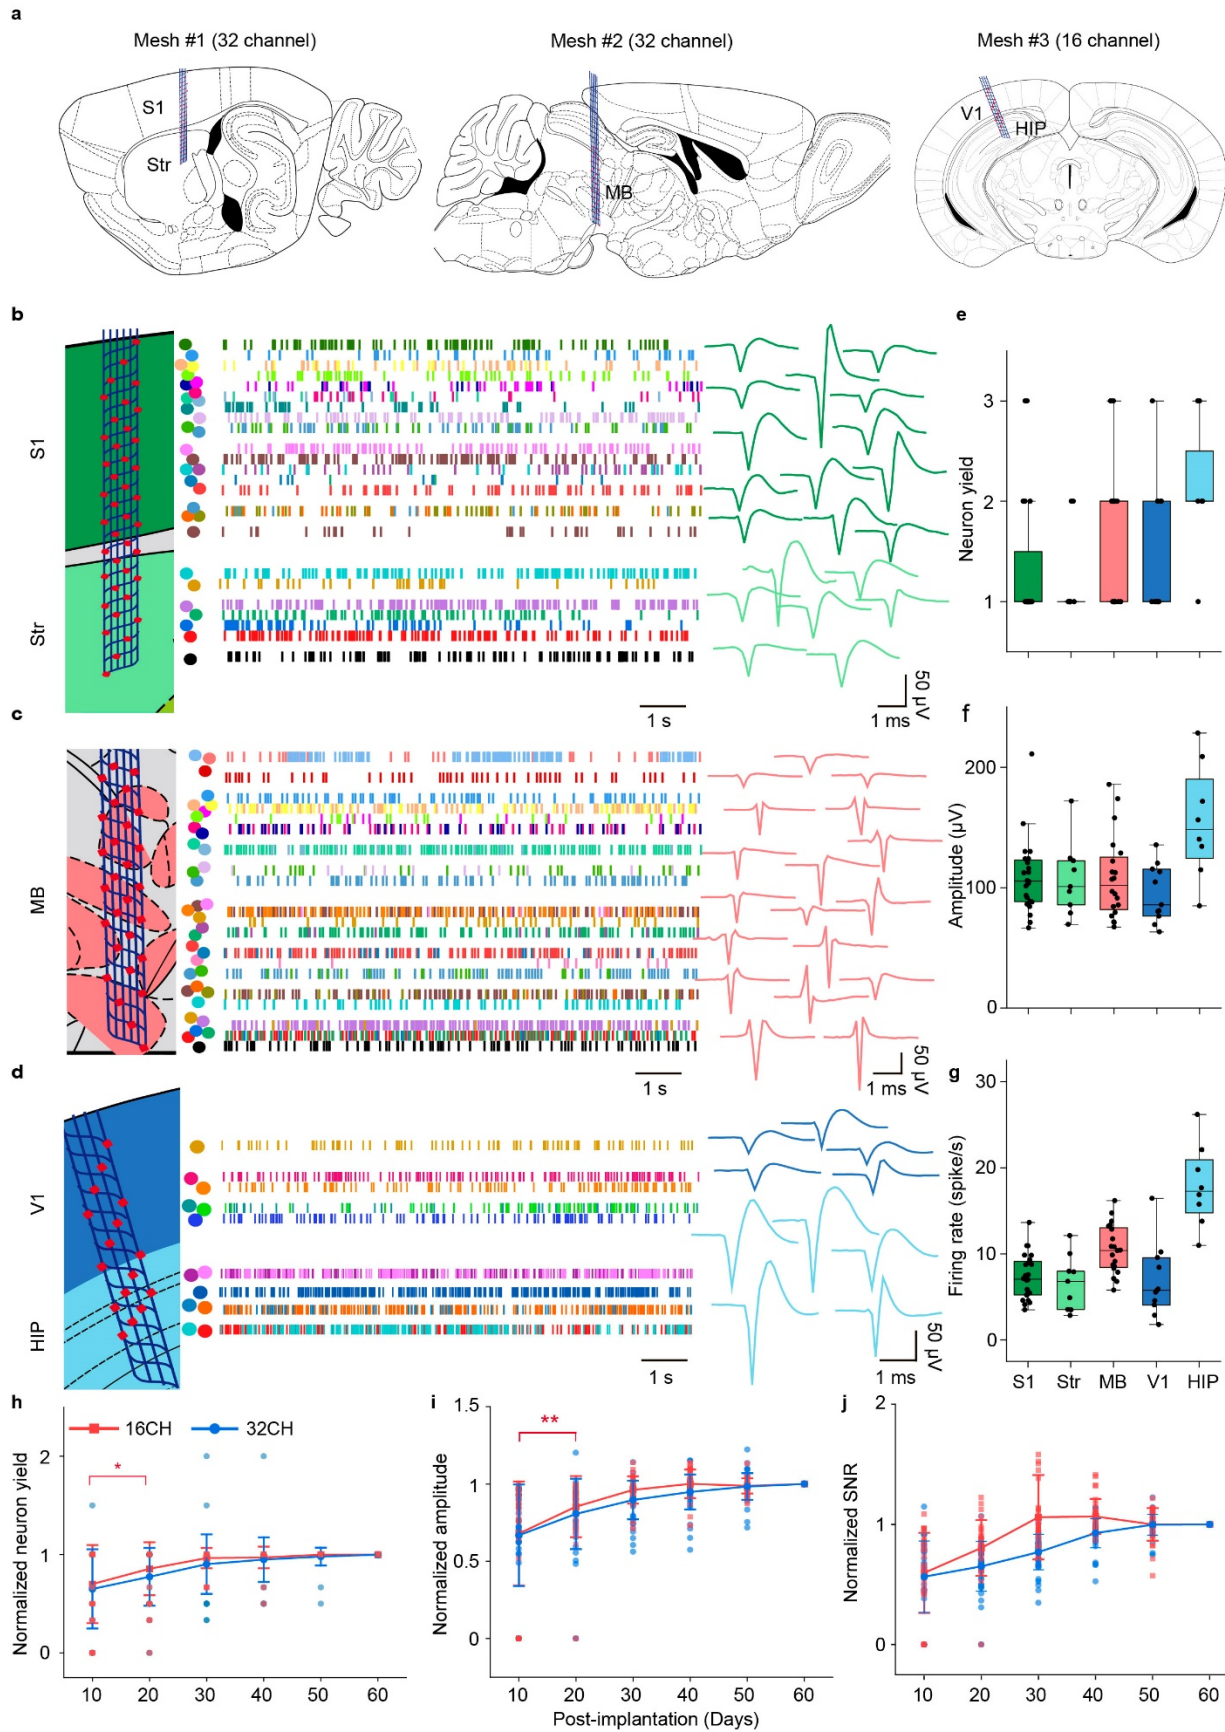

459 **Fig. 3 | Chronically stable recording across multiple brain regions.** **a**, Schematics illustrating  
460 the representative brain regions implanted with mesh nanoelectronics for chronic recording. S1,  
461 primary somatosensory cortex; Str, striatum; MB, midbrain; V1, primary visual cortex; HIP,  
462 hippocampus. **b-d**, Approximate mesh locations overlaid on the Allen Mouse Brain Atlas (left)  
463 and representative spiking raster (middle) and single-unit waveform (right) from two 32-channel  
464 (**b, c**) and one 16-channel (**d**) mesh nanoelectronics in head-fixed behaving animals at 60 days  
465 post-implantation. Colored dots and blocks indicate individual neurons and spike times,  
466 respectively (middle). Representative average single-unit action potential waveforms were  
467 extracted from a 2-min recording session (right). **e-g**, Quantification of sorted neuron yield per  
468 electrode (**e**), waveforms amplitude (**f**), and firing rate (**g**) across 5 brain regions in a 2 min  
469 recording session. Box plots show median and quartile range (whiskers denote 1.5× the  
470 interquartile range). Individual data points are overlaid ( $n = 29$  electrodes from three 16-channel  
471 mesh nanoelectronics and  $n = 43$  electrodes from two 32-channel mesh). **h-j**, Normalized sorted  
472 neuron yield (**h**), amplitude (**i**), and signal-to-noise ratio (SNR) (**j**) over the time course of 60 days.  
473 Data represented mean  $\pm$  SD, individual data points are overlaid ( $n = 29$  electrodes from three 16-  
474 channel mesh nanoelectronics and  $n = 43$  electrodes from two 32-channel mesh nanoelectronics.  
475 \* $p < 0.05$ , \*\* $p < 0.01$ , comparison of different days within 16-,32-channel mesh electronics, two-  
476 tailed unpaired  $t$  test).  
477

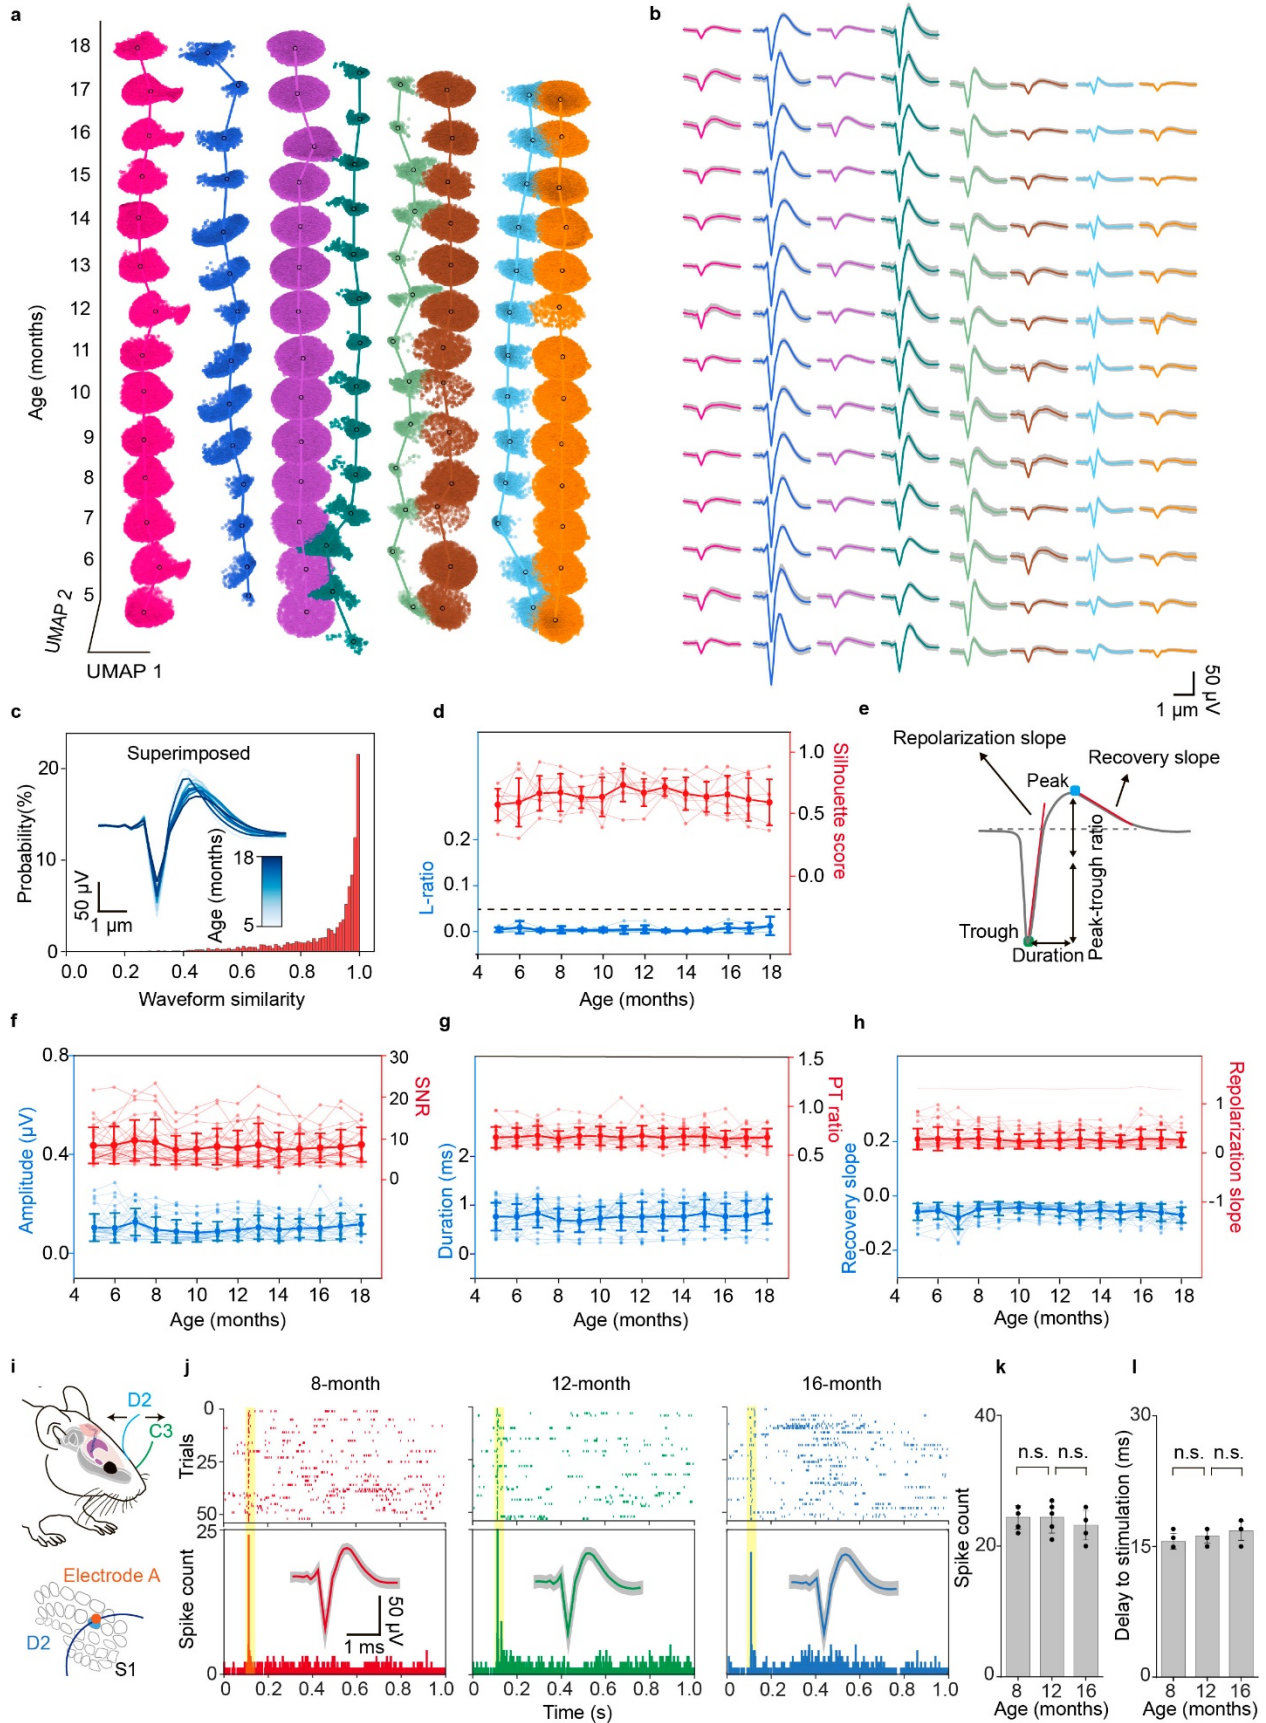



479 **Fig. 4 | Stably tracking the single-unit action potential from the same group of neurons over**  
480 **the entire adult life of mice.** **a**, Time evolution of single-units clustered by *Leiden* over the entire  
481 adult life of mice from the mature adult (5 months) to the aged (18 months) stage. The x- and y-  
482 axes denote the first and second uniform manifold approximation and projection (UMAP)  
483 dimensions, respectively, and the z-axis denotes mouse age in months. Color scheme maintained  
484 throughout. **b**, Time course analysis of the average waveforms of single-unit action potential in  
485 the *Leiden* clustering results in (**a**). Waveform represented mean  $\pm$  SD. **c**, Waveform correlations  
486 for every single-unit across all recording sessions ( $n = 26$  units from 3 mice). Inset: Overlaid  
487 average waveforms across all recording session for the representative putative same neuron. **d**,  
488 Likelihood-ratio (L-ratio) and silhouette score showing the clustering quality for the single unit  
489 action potentials from identified neurons. Data represented mean  $\pm$  SD, individual data points are  
490 overlaid. The constant dashed line is 0.05 L-ratio, commonly taken as a threshold of high cluster  
491 quality. **e**, Schematic showing features extracted from the single-unit action potential waveform  
492 used for the analysis in (**f-h**). **f-h**, mean  $\pm$  SD (individual data points are overlaid) of features  
493 illustrated in (**e**) and signal-to-noise ratio (SNR) over three mice life recording. In order, amplitude,  
494 SNR, duration, peak-trough ratio (PT ratio), recovery slope, and repolarization slope are shown. **i-**  
495 **l**, Long-term stable recording of the behavior-associated neuron. **i**, Schematic diagram of whisker  
496 deflection. An individual vibrissa was deflected in the rostral-caudal plane using a computer-  
497 controlled galvanometer system. D2 and C3 whiskers are labeled in blue and green, respectively  
498 (top). Schematic diagram of whisker barrel arrangement in S1 (bottom). Evoked spike from  
499 electrode A was associated with D2 whisker deflection. Control experiments were shown in  
500 Extended Data Fig. 7. **j**, Raster plot and peri-stimulus time histogram (PSTH, 1 ms bin size) of the  
501 single unit identified from electrode A response to D2 whisker deflection from 8- to 16-month  
502 recording. Inset: average single-unit waveforms from recordings in the S1 in response to D2  
503 whisker deflection over time, Waveform represented mean  $\pm$  SD. **k**, Population data showing the  
504 number of spikes (out of 55 trials) evoked by whisker deflection over the time course of  
505 implantation. **l**, Time delay of the evoked spikes to the stimulation over the time course of  
506 implantation (n.s.: not significant, two-tailed unpaired  $t$  test,  $n = 5$ ). Individual data points are  
507 overlaid.

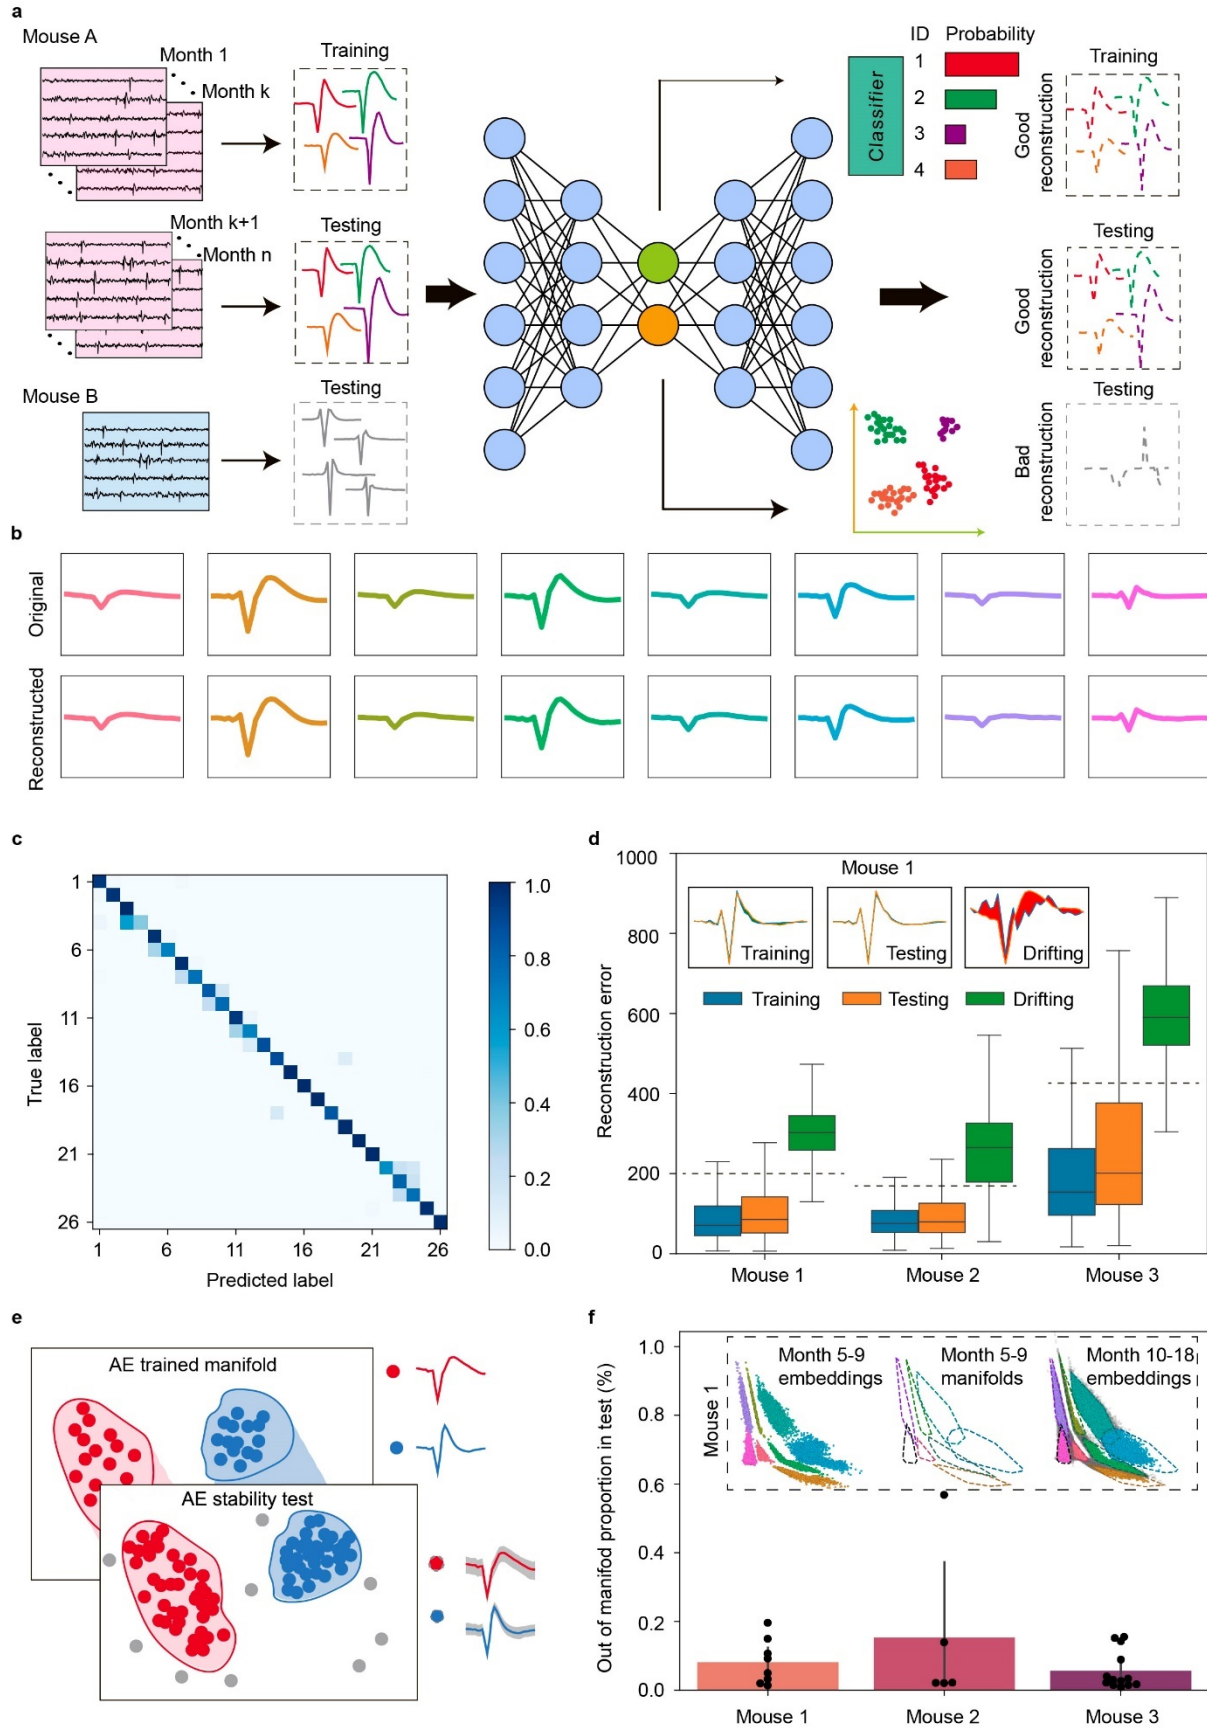



509 **Fig. 5 | Long-term stable single-cell recording enabled autoencoder-based spike processing.**  
510 **a**, Schematics of an autoencoder-based model which consists of an encoder, a classification head,  
511 and a decoder. Single-unit action potential waveforms are first extracted from the recording  
512 voltage traces and encoded with channel number to a lower-dimensional latent space. The latent  
513 representation is then used for classification and decoding. Spikes from the first 6 recording  
514 months including 5,490 spikes were used for training. The subsequent 8 months of data including  
515 158,317 spikes were used for testing. Spikes from different groups of neurons collected from a  
516 different mouse were also used as simulated drifting data for testing. **b**, Original and reconstructed  
517 average representative single-unit waveforms from the testing data. Original waveforms are  
518 colored by neuron labels. Reconstructed waveforms are colored by the classification output. **c**,  
519 Confusion matrix comparing testing dataset ground-truth neuron labels with autoencoder  
520 classification output across all three mice. **d**, Boxplot of median and quartile range of mean-  
521 squared error (MSE) distribution for each of the training, testing, and drift datasets. Whiskers  
522 denote  $1.5\times$  interquartile range. Dashed lines indicate thresholds corresponding to mean + SD of  
523 mouse-specific MSE training distribution, eliminating  $83 \pm 4\%$  of training and  $86 \pm 7\%$  of testing  
524 (Extended Data Fig. 8f). Inset: representative average waveforms and their corresponding  
525 reconstructions by the mouse-specifically trained autoencoder. The colored areas correspond to  
526 the difference between the reconstructed and original waveform. **e**, Schematics showing the  
527 autoencoder can be used to quantify the stability of the recording. The trained manifold  
528 (highlighted by red and blue) was used to test the stability of the recording by quantifying the  
529 percentage of the neuron single-unit action potentials from the testing data falling inside the  
530 training manifold. **f**, Bar plot illustrating the percentage of the testing dataset for each neuron  
531 falling outside of the training manifold as per the process illustrated in (e). Data represented mean  
532  $\pm$  SD, individual data points are overlaid. Low levels of detected noise suggest recording stability  
533 through train-test waveform resemblance. Inset: applying noise rejection process to mouse 1 data,  
534 in order: training embeddings, training manifold boundaries, testing embeddings with out-of-  
535 manifold spikes colored in grey.

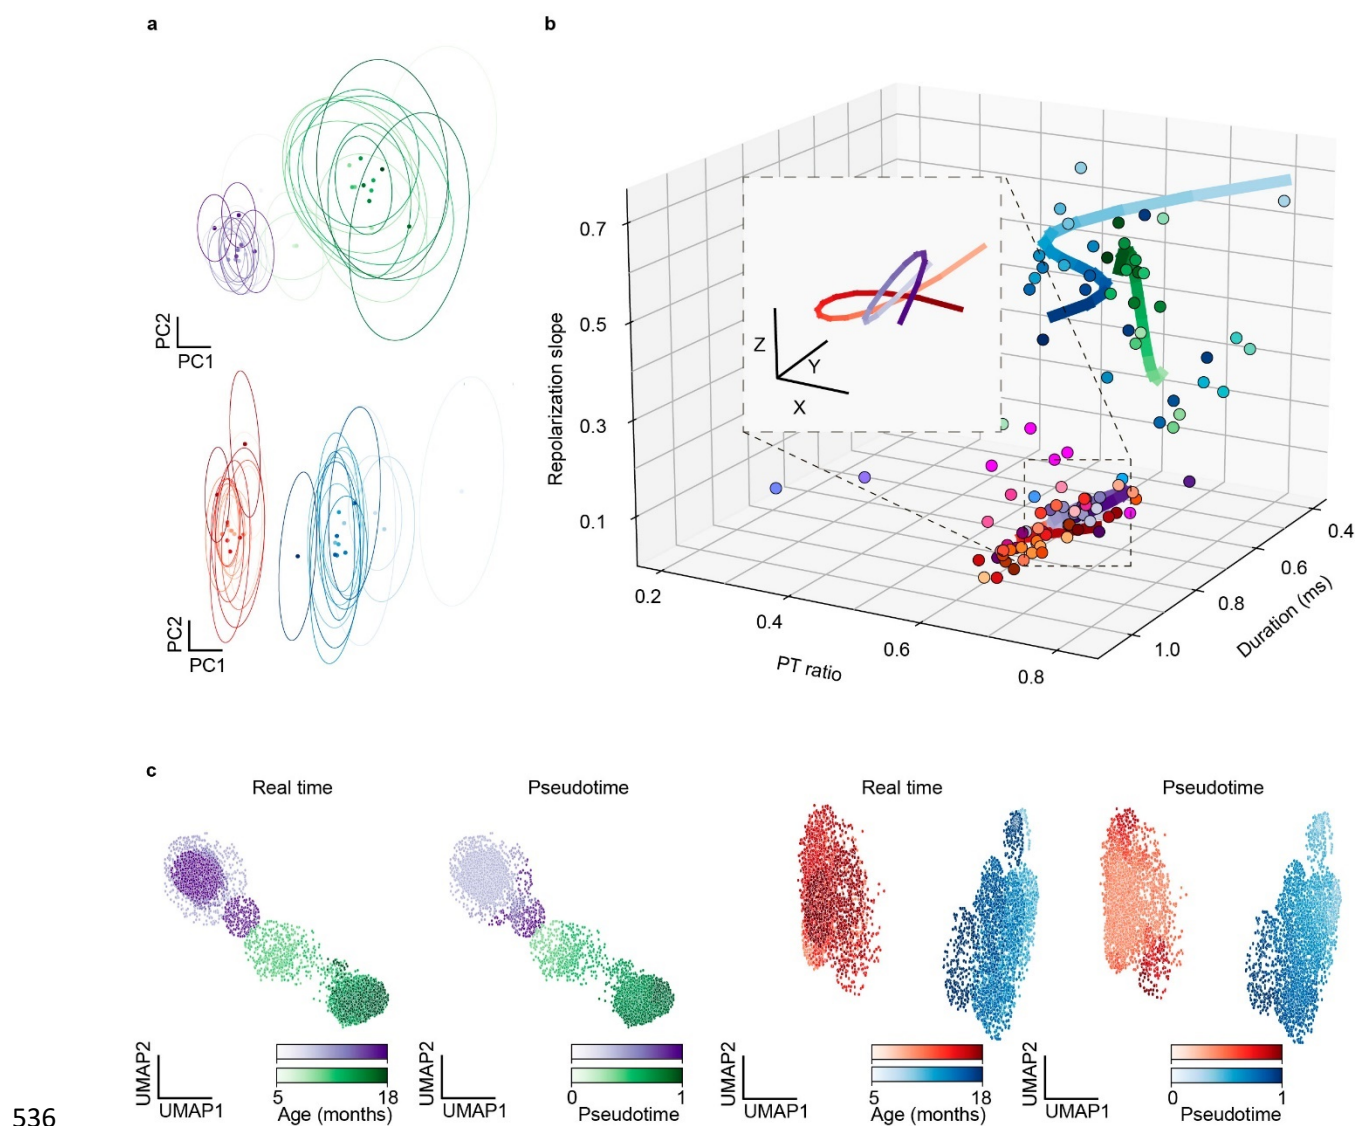

536

537 **Fig. 6 | Adult life study of brain aging at the single-neuron level.** **a**, Principal component  
 538 analysis (PCA) of representative waveforms of neurons showing stable (purple and red) and  
 539 progressive changing (green and blue) electrophysiological behaviors. Dots and ovals represent  
 540 the centers and  $\pm 2\sigma$  of PC clusters, respectively. Average cluster centroid successive position  
 541 shifts:  $0.47\sigma_{\text{purple}}$ ,  $0.58\sigma_{\text{red}}$ ,  $1.96\sigma_{\text{green}}$ ,  $2.63\sigma_{\text{blue}}$ . Low values indicate stable cluster centroid  
 542 position across time relative to single cluster whereas high values suggest time-evolution of  
 543 corresponding cluster centroids and associated single-unit action potential waveforms. In both  
 544 cases, a single electrode channel tracked stable ( $< 1\sigma$ ) and time-evolving single-unit action  
 545 potential waveform. **b**, Trajectory analysis conducted with a B-spline interpolation of  
 546 representative waveform features over the time course of implantation for the same neurons. Dots  
 547 with the same color represented mean values of features calculated by the waveforms associated  
 548 with the same color-coded neurons from data shown in (a). Trajectories highlight the  
 549 representative neurons shown in (a) showing slow progressive and aging-associated  
 550 electrophysiological properties. Inset: zoom-in view of purple and red trajectory. Scale bar,  $x =$

551 0.01,  $y = 0.025$ ,  $z = 0.01$ . **c**, Comparison of the electrophysiology Monocle3-based pseudotime and  
552 real time evolution over the adult life of mice of overall UMAP representation of representative  
553 individual single-unit action potential waveforms. Pairs of neurons recorded by the same electrode  
554 are compared.

## 555 **Methods**

### 556 **1. Fabrication of ultra-thin shuttle monolithically integrated mesh nanoelectronics**

557 (1) Cleaning a silicon wafer grown with thermal oxide (500-nm thickness) with acetone, isopropyl  
558 alcohol, and deionized water. (2) Depositing 100-nm-thick nickel (Ni) using a Sharon thermal  
559 evaporator as a sacrificial layer. (3) Spin-coating SU-8 precursor (SU-8 2000.5, MicroChem) at  
560 3000 rpm, which was pre-baked at (65 °C, 95 °C) for 2 min each, exposed to 365 nm ultra-violet  
561 (UV) for 200 mJ/cm<sup>2</sup>, post-baked at (65 °C, 95 °C) for 2 min each, developed using SU-8  
562 developer (MicroChem) for 60 s, and hard-baked at 180 °C for 40 min to define mesh SU-8  
563 patterns for bottom encapsulation. (4) Spin-coating LOR3A photoresist (MicroChem) at 4000 rpm,  
564 followed by pre-baking at 180 °C for 5 min; spin-coating S1805 photoresist (MicroChem) at 4000  
565 rpm, followed by pre-backing at 115 °C for 1 min; the sample was then exposed to 405 nm UV  
566 for 40 mJ/cm<sup>2</sup>, and developed using CD-26 developer (Microposit) for 70 s to define interconnects  
567 patterns. (5) Depositing 5/70/5-nm-thick chromium/gold/chromium (Cr/Au/Cr) by a Denton  
568 electron-beam evaporator, followed by a standard lift-off procedure in remover PG (MicroChem)  
569 to define the Au interconnects. (6) Repeating Step (4) to define electrode array patterns in  
570 LOR3A/S1805 bilayer photoresists. (7) Depositing 5/50-nm-thick chromium/platinum (Cr/Pt) by  
571 a Denton electron-beam evaporator, followed by a standard lift-off procedure in remover PG  
572 (MicroChem) to define the electrode array. (8) Repeating Step (3) for top SU-8 encapsulation. (9)  
573 Spin-coating SU-8 precursor (SU-8 2025, MicroChem) at 4000 rpm, which was pre-baked at 65 °C  
574 for 2 min and 95 °C for 8 min, exposed to 365 nm ultra-violet (UV) for 200 mJ/cm<sup>2</sup>, post-baked  
575 at 65 °C for 2 min and 95 °C for 6 min, developed using SU-8 developer (MicroChem) for 6 min,  
576 and hard-baked at 180 °C for 1 hour to define SU-8 anchors patterns to connect the mesh and SU-  
577 8 shuttle. (10) Spin-coating 20 wt% dextran solution at 1000 rpm for 20 s. which was at 80 °C for

578 1 min and 180 °C for 30 min. (11) Spin-coating SU-8 precursor (SU-8 2025, MicroChem) at 3000  
579 rpm, which was pre-baked at 65 °C for 2 min and 95 °C for 8 min, exposed to 365 nm ultra-violet  
580 (UV) for 200 mJ/cm<sup>2</sup>, post-baked at 65 °C for 2 min and 95 °C for 6 min, developed using SU-8  
581 developer (MicroChem) for 6 min, and hard-baked at 180 °C for 1 hour to define the SU-8 shuttle  
582 pattern. (12) Cleaning the input/output with water and soldering a 32-channel flexible flat cable  
583 (Molex) onto the input/output pads using a flip-chip bonder (Finetech Fineplacer). (13) Soaking  
584 the mesh nanoelectronics in nickel etchant for 2 to 4 hours to completely release the mesh  
585 nanoelectronics from the substrate wafer. (14) Rinsing the mesh nanoelectronics with deionized  
586 water and PBS three times each. (15) Dicing the substrate to the desired length. Dip-coating 10  
587 wt% PEG solution to attach the mesh nanoelectronics and SU-8 polymer shuttle. The  
588 monolithically integrated mesh nanoelectronics was allowed to dry in the air. (16) After cutting  
589 the anchor, the monolithically integrated mesh nanoelectronics was ready for implantation.

590

## 591 **2. Bending stiffness calculations**

592 We estimated and compared the bending stiffness values (D) of mesh and thin-film nanoelectronics  
593 using a beam model. The bending stiffness of mesh nanoelectronics with three-layer  
594 polymer/mesh/polymer structure can be calculated as

$$595 \quad D = \frac{E_s}{12} (wh^3 - w_m h_m^3) + \frac{E_m}{12} w_m h_m^3 \quad (1)$$

596 where  $E_s$  and  $E_m$  are the young's moduli of SU8 and gold, 2 and 79 GPa, respectively,  $w$  is the  
597 width of SU-8 scaffolds,  $w_m$  is the width of gold interconnects,  $h_{mesh} = 0.91 \mu\text{m}$  and  $h_{film} = 0.92 \mu\text{m}$   
598 is the measured total thickness of SU-8,  $h_{metal} = 80 \text{ nm}$  is the thickness of Cr/Au interconnects. The

599 calculated bending stiffness of mesh and thin-film nanoelectronics,  $1.26 \times 10^{-15} \text{ N} \cdot \text{m}^2$  and  $39.8 \times 10^{-15} \text{ N} \cdot \text{m}^2$ , respectively.

601

### 602 **3. Brain implantation**

603 All the animal experiments were approved by the Institutional Animal Care and Use Committee  
604 of Harvard University. The implantations were carried out on the male C57BJ/6 mice (~16 weeks  
605 of age). The animals were housed in a regular 12 h/12 h light/dark cycle. Animals were  
606 anesthetized with 2-3% isoflurane and maintained under anesthesia with 0.75–1% isoflurane  
607 during the intracranial implantation surgery. Stainless-steel screws were implanted in the  
608 cerebellum and used as ground electrodes. A craniotomy ( $2 \times 2 \text{ mm}^2$ ) was performed on the brain,  
609 and the cortical surface was exposed upon removal of the dura mater. The mesh nanoelectronics  
610 with the releasable shuttle was attached onto a micromanipulator on the stereotaxic frame. The  
611 micromanipulator was manually controlled to insert the nanoelectronics into the mouse brain at  
612 the targeted depth at the tip. Sterile PBS was applied on the rear end of the nanoelectronics to  
613 dissolve the PEG/dextran and release the SU-8 shuttle from mesh nanoelectronics. After  
614 PEG/dextran was fully dissolved on both ends, the SU-8 shuttle was extracted with the second  
615 manipulator, leaving ultra-flexible mesh nanoelectronics implanted at the target positions.  
616 Craniotomies were sealed with a silicone elastomer (World Precision Instruments, USA). Ceramic  
617 bone anchor screws, together with dental methacrylate, were used to fix the FFC and electrode set  
618 onto the mice's skull.

619

### 620 **4. Immunohistochemistry**

621 The following procedures were performed according to our previous reports<sup>18,48</sup>

622 **Histology sample preparation:** At each time point (2-, 6-, 12-week and 1-year post-implantation),  
623 mice were anesthetized with 40-50 mg/kg sodium pentobarbital and then transcardially perfused  
624 with ~40 ml PBS pre-wash, and ~40 ml 4 % paraformaldehyde (PFA) in PBS, followed by  
625 decapitation. The scalp skin was removed, and the exposed skull/dental cement were ground for  
626 10–20 min at 15,000 r.p.m. using a high-speed micro motor tool. The brain with the mesh/thin film  
627 nanoelectronics undisturbed was removed from the cranium and postfixed in PFA for 24 h at 4 °C.  
628 The brain was transferred to incrementally increasing sucrose solutions (10–30%, w/v) until sunk  
629 to the bottom for the thin tissue preparation.

630 **Immunohistochemical staining of 20- $\mu$ m thin tissue:** After cryostat sectioning, brain slices were  
631 incubated PBST (1  $\times$  PBS with 0.2% Triton X-100, Thermo Fisher Scientific) for 30 min, and then  
632 blocked with 5 % (w/v) normal donkey serum for 2 hours. After three rinses with PBST for 30  
633 min each, slices were then incubated at 4 °C overnight in the primary antibodies: chicken anti-glial  
634 fibrillary protein GFAP (targeting astrocytes, 1:200, Abcam #ab4674, USA), goat anti-ionized  
635 calcium binding adaptor molecule 1 (Iba1) (targeting microglia, 1:100, Abcam #ab5076, USA),  
636 and rabbit anti-neuronal nuclear NeuN (targeting nuclei of neurons, 1:200, Abcam #ab177487,  
637 USA), followed by the slices being washed three times for 30 min each with PBST. Slices were  
638 then incubated in a secondary antibody solution at room temperature for 2 h with protection from  
639 light (1:500, Alexa Fluor 647 donkey anti-chicken, Jackson Immunoresearch, USA; 1:500, Alexa  
640 Fluor 594 donkey anti-goat; 1:500, Alexa Fluor 488 donkey anti-rabbit, Invitrogen, USA). After  
641 being washed three times for 30 min each with PBST, brain slices were also stained by incubating  
642 with 4',6-diamidino-2-phenylindole (DAPI, Sigma-Aldrich, USA) to mark all cell nuclei for 30  
643 min. After being washed, slices were mounted on glass slides with coverslips using Prolong Gold



644 (Invitrogen, USA) mounting media. The slides remained covered (protected from light) at room  
645 temperature, allowing for 12 h of clearance before imaging.

646 **Tissue clearing and staining for thick tissues:** After vibratome sectioning, brain slices were  
647 placed in 1 × PBS containing 4% (w/v) acrylamide (Sigma-Aldrich) and 0.25% (w/v) VA-044  
648 thermal polymerization initiator (Fisher Scientific) at 4 °C for 3 days. The solution was replaced  
649 with fresh solution immediately before placing the brain slices in X-CLARITY polymerization  
650 system (Logos Biosystems) for 3 h at 37 °C. After polymerization, any remaining gel from the  
651 tissue surface was removed and the slices were rinsed with PBST before placing them in  
652 electrophoretic tissue clearing solution (Logos Biosystems) at 37 °C for 3–5 days until the samples  
653 were translucent. Brain slices were incubated with PBST overnight, followed by three washes with  
654 PBST, and then blocked with 5 % (w/v) normal donkey serum for 2 days. After three rinses with  
655 PBST, slices were then incubated at 4 °C for 5-7 days in the primary antibodies containing: chicken  
656 anti-gial fibrillary acidic protein (GFAP) (targeting astrocytes, 1:200, Abcam #ab4674, USA)  
657 and/or and NeuN (targeting nuclei of neurons, 1:200, Abcam #ab177487, USA), followed by the  
658 slices being washed three times with PBST. Slices were then incubated in a secondary antibody  
659 solution at 4 °C for 5-7 days with protection from light (1:500, Alexa Fluor 647 donkey anti-  
660 chicken, Jackson Immunoresearch, USA; 1:500 and/or Alexa Fluor 488 donkey anti-rabbit,  
661 Invitrogen, USA). After being washed three times with PBST, brain slices were also stained by  
662 incubating with 4',6-diamidino-2-phenylindole (DAPI, Sigma-Aldrich, USA) to mark all cell  
663 nuclei for 2 days. Brain slices were glued at their edge to the bottom of Petri dishes with 1% (w/v)  
664 agarose in optical clearing solution (Lifecanvas Technologies) 24 h before microscopy imaging.

665

666 **5. Microscope imaging and image data analysis**



667 Confocal fluorescent images were acquired using a Leica SP8 confocal system (Leica, USA).  
668 Images were collected using a 25×, 0.95 NA water-immersion or 40×, 1.3 NA oil-immersion  
669 objective lens. 488 nm, 591 nm, and 633 nm lasers as the excitation sources for Alexa Fluor 488,  
670 Alexa Fluor 594, and Alexa Fluor 647, respectively. Standard TIFF files were exported and  
671 colorized using LAS X Software. ImageJ software and custom code were used for image analysis.  
672 The distance of each pixel to mesh/film nanoelectronics was defined as its shortest distance from  
673 the mesh/film boundary. Baseline fluorescence intensity is defined as the average fluorescence  
674 intensity of all pixels 525–550  $\mu\text{m}$  away from the boundary. Intensity values with distances binned  
675 over an interval of 25  $\mu\text{m}$  were averaged and normalized against the baseline intensity.

676

## 677 **6. Electrophysical measurement**

678 Mice with implanted mesh nanoelectronics and FFC connector were recorded chronically monthly  
679 using CerePlex Direct recording system (Blackrock Microsystem, USA), starting from 1-month  
680 post-implantation. Mice were anesthetized with 1 % isoflurane in medical-grade  $\text{O}_2$  or head-fixed  
681 during the measurement. Homemade PCB for connecting the FFC and head stage. Two animals  
682 are excluded from the long-term study (Fig. 4) since the poor body condition and connectors failed  
683 at an early stage. The electrophysiological recording was made with a 30-kHz sampling rate and a  
684 60-Hz notch filter. Whiskers of interest were trimmed at  $\sim 15$  mm from the face and inserted into  
685 a polyimide tube fixed to the galvanometer system (PT-30K, SpaceLas, China) positioned  $\sim 10$  mm  
686 from the vibrissal pad to yield high-fidelity sensory stimuli. Stimulation was always delivered  
687 along the rostro-caudal axis. Voltage command and output for the actuator were programmed by  
688 Axon Digidata 1550B (Molecular Devices, USA).

## 689 7. Data analysis

690 **Spike sorting and clustering:** All recording data was analyzed offline. 6 min continuous  
691 recordings were used for analysis of each month. Spike detection was performed using the  
692 *WaveClus3* software package ([https://github.com/csn-le/wave\\_clus](https://github.com/csn-le/wave_clus)). In brief, raw recording data  
693 was filtered using four poles Butterworth filters in the 300-3000 Hz frequency range before spikes  
694 were detected using an amplitude threshold 5 times the estimated standard deviation of the noise.  
695 After spike alignment, 30 data points with the sampling rate of 10 kHz were kept for each detected  
696 spike representing 3 ms. No normalization procedure was applied to the spike waveforms due to  
697 the stable nature of recorded amplitudes (Fig. 4f) and experiments (Extended Data Fig. 10a-f)  
698 showing normalization decreased putative neuron cluster separability as well as meaningfulness  
699 of PCA embeddings. Spike sorting results of *WaveClus3* obtained through superparamagnetic  
700 clustering were kept and used for comparison with the results of our chosen spike sorting approach.  
701 Additional quality metrics calculated for individual neurons demonstrate that the individual  
702 neurons were clearly defined (Extended Data Fig. 10g-i). Results reported in Figure 4 and 6 used  
703 clusters determined by *Leiden*<sup>49</sup>(<https://github.com/vtraag/leidenalg>) clustering performed on the  
704 graph constructed by Uniform Manifold Approximation and Projection (UMAP,  
705 <https://github.com/lmcinnes/umap>) for each individual month and over individual channels.  
706 Geometric considerations ensured that no neuron was being recorded by two separate channels.  
707 Cluster labels were then aligned by choosing a label matching scheme which minimized the mean-  
708 squared error between the average cluster waveforms of a given month and a chosen template.

709 **Stability analysis of single-unit action potentials:** After spike detection, sorting and clustering,  
710 stability analysis was performed. A custom computational pipeline for assessing the stability  
711 analysis, which was built using Python v3.9.4. Performing prior spike extraction using third-party

712 software or using the pipeline to perform spike extraction and sorting directly in python are both  
713 possible.

714 UMAP analysis was used to confirm the recording stability. UMAP embeddings' coordinates were  
715 calculated for all spikes of a given channel before plotting the corresponding points per recording  
716 month producing a visualization over time. The representations originating from different channels  
717 were plotted next to each other after manual curation for quality control to ensure only the best  
718 quality spikes were included in the analysis. Additionally (Fig. 6a), average cluster centroid  
719 position shifts were compared to average cluster distributions spread. Concretely, let us name  $X \in$   
720  $\mathbb{R}^{d \times 2}$  a vector of cluster centroid positions over  $d$  days in a given 2D  $(x, y)$  embedding. For each  
721 identified neuron, we calculated:

$$722 \quad \sqrt{\left(\frac{u_x}{\sigma^{av}_x}\right)^2 + \left(\frac{u_y}{\sigma^{av}_y}\right)^2} \quad (2)$$

723 with  $u_x = \frac{1}{d-1} \sum_{i=1}^{d-1} |x_{i+1} - x_i|$ ,  $u_y = \frac{1}{d-1} \sum_{i=1}^{d-1} |y_{i+1} - y_i|$  the average successive cluster  
724 centroid absolute position shifts along each axis, and  $\sigma^{av}_x = \frac{1}{d} \sum_{i=1}^d \sigma^x_i$ ,  $\sigma^{av}_y =$   
725  $\frac{1}{d} \sum_{i=1}^d \sigma^y_i$  the average cluster distribution SD along each axis. This allowed us to compare  
726 centroid position shifts with average cluster SD along each axis to examine the embedded  
727 waveform stability. Results of correlation analysis using Pearson correlation coefficients and  
728 associated two-sided  $t$  tests were carried out using *scipy* v1.6.3 (<http://www.scipy.org>) stats  
729 module.

730 Cluster quality metrics shown in Figure 4d were obtained by calculating silhouette score using  
731 scikit-learn v0.24.2's (<http://scikit-learn.org>) implementation over individual channels and months.  
732 L-ratio for an individual cluster was calculated as

733 
$$L_{ratio}(C) = \frac{L(C)}{n_c}, \quad (3)$$

734 where,  $L(C) = \sum_{i \notin C} 1 - CDF_{\chi^2_{df}}(D_{i,C}^2)$  (4)

735 with  $n_c$  the number of spikes belonging to cluster  $C$ ,  $CDF_{\chi^2_{df}}$  the cumulative distribution function  
736 of the  $\chi^2$  distribution,  $df = 2$  in our case and  $D_{i,C}^2$  being the mahalanobis distance of spike  $i$  from  
737 the center of cluster  $C$ . Linear regressions were performed using scikit-learn.  
738 Within unit correlation analysis in Figure. 4c was calculated based on the Pearson product-moment  
739 correlation coefficient. The *corrcoef* function in *numpy* v1.18.5 (<http://www.numpy.org>) was used  
740 between all pairs of average cluster waveforms and recording days to provide the auto and cross  
741 correlation coefficients. Feature extraction was performed by using functions adapted from  
742 *AllenSDK* (<https://github.com/AllenInstitute/AllenSDK>).

743 **Analysis of interspike intervals:** The spiking times of each sorted neuron were used to calculate  
744 the interspike interval (ISI) histograms for individual months per cluster with a bin size of 2 ms.

745 **Data analysis of whisker-stimulus provoked recording:** For whisker responsive recording,  
746 firing timing of each detected single-unit spike was presented and aligned by trial number in the  
747 raster plot. For the peristimulus time histogram (PSTH), 1 ms bin size was used and the spike  
748 counts were accumulated from all trials within each recording session.

749 **Autoencoder-based automatic spike processing:** All autoencoders were built using *tensorflow*  
750 2.5 (<https://www.tensorflow.org>). The encoder consisted of two fully connected (FC) layers with  
751 100 nodes each before the bottleneck 2D layer. Inputs to the network were concatenations of  
752 individual spike waveforms and their corresponding one-hot encoded channel (geometric  
753 considerations of the sparsity of the mesh recording device ensure that no single neuron can be

754 recorded on two separate channels). From the bottleneck, the classification head, which consists  
755 of a single FC layer with *softmax* activation, outputs probabilities of belonging to a particular  
756 neuron class. The decoder's symmetric structure with respect to the encoder allows for  
757 reconstruction of the original waveform. Activations for encoder and decoder layer were set as  
758 *LeakyReLU* with  $\alpha = 0.3$  as well as an added  $L_2$  regularizer on the encoder's last layer,  
759 enforcing lower latent embedding values. Adam optimizer with default parameters was used. For  
760 a given dataset,  $X \in R^{n \times 30}$ ,  $n \in \mathbb{N}$  of  $n$  spikes, each composed of 30 data points recorded on  $c$   
761 channels, we denote the input batch to the autoencoder  $\hat{X} \in R^{p \times (30+c)}$ . The autoencoder  
762 considered here is composed of an encoder,  $f_e$ , decoder  $f_d$  and classifying head  $f_c$  parametrized by  
763  $\theta = (\theta_e, \theta_d, \theta_c)$ . The network's (slightly simplified, as the encoder's last layer regularization is  
764 not explicit here) loss function over a batch of  $p$  spikes is thus:

$$765 \quad L(\hat{X}, \theta) = \sum_{i=1}^p [\alpha \|x_i - f_d(f_e(x_i))\|_2^2 + \beta CE(f_c(f_e(x_i)))] \quad (5)$$

766 where CE is the usual categorical cross-entropy loss used for multi-class classification problems.  
767 The loss function is clearly defined by two components: reconstruction and classification, each  
768 with their own weight to regulate their overall contribution to the loss function (reconstruction  
769 error is also on a different scale than the cross-entropy loss so the relative weighting terms  $\alpha$  and  
770  $\beta$  are necessary for balancing contributions of the losses). Training the network consists of learning  
771 the correct parametrization  $\theta$  (network weights) which minimizes the loss function over the  
772 training dataset. Early Stopping was applied on an evaluation dataset to avoid overfitting of the  
773 training data. One autoencoder was trained per mouse using a subset of that mouse's first months  
774 recording data. The subset was chosen using conservative thresholds on the within-cluster centroid  
775 distance of UMAP embedded spike waveforms. This allows to train the autoencoder in a very short  
776 time on high-quality spikes without hurting classification results (Extended Data Fig. 8b). It also

777 means the autoencoder’s training manifold can be used as a stability verification tool (Fig. 5f and  
778 Extended Data Fig. 8h-k). Indeed, waveforms recorded in the later parts of the recordings with  
779 similar shapes as the high-quality training waveforms will fall inside the training manifold.

780 **Aging analysis at the single-neuron level:** UMAP coordinates of the representation in Fig. 4 were  
781 used to visualize the different neuron trajectories shown in Figure 6 defined by their  
782 electrophysiological properties across the adult mouse life recording. Indeed, these UMAP  
783 embeddings were used to compute a trajectory graph with the corresponding “pseudo temporal”  
784 scale of evolution, with *Monocle 3* (<https://cole-trapnell-lab.github.io/monocle3>). The convex hull  
785 delimiting regions spanned by individual neuron time-evolution was calculated using *Scipy*;  
786 Principal Component Analysis (PCA) was used as another form of dimensionality reduction and  
787 was calculated per channel and month to view the evolution of spike waveforms per cluster  
788 (Extended Data Fig. 6b). Clusters obtained from the same channel were used to obtain cluster  
789 centroids per channel for individual recording months along with 2 SD confidence ellipses of  
790 corresponding covariance. Confidence ellipses were centered on cluster means while radii were  
791 calculated without explicit computation of eigenvalues by using Pearson correlation coefficients  
792 and equations (6) and (7):

793

$$794 \quad \sqrt{\lambda_1} = \sqrt{1 + p} \quad (6)$$

$$795 \quad \sqrt{\lambda_2} = \sqrt{1 - p} \quad (7)$$

796 where  $\lambda_1$  and  $\lambda_2$  are the eigenvalues of the covariance matrix and  $p$  is the Pearson correlation  
797 coefficient. These equations hold for normalized data; thus, ellipses were scaled by twice the  
798 standard deviation along each axis to render the final plots.

799 Feature trajectory analysis was performed by fitting trajectories, from feature embeddings in a  
800 selected 3D feature space of mean feature values per cluster over real recording months. The  
801 features chosen for the representation were repolarization slope, peak trough ratio and duration.  
802 These were selected based on prior correlation analysis (Extended Data Fig. 9a) to make sure the  
803 trajectory was not a degenerate representation of feature evolution because of highly correlated  
804 features. Trajectory fittings were constructed using a B-spline interpolation on previously  
805 discussed points by first finding the parametric definition of the curve using *Scipy splrep* function  
806 before evaluating the spline using *splev* function. A cubic ( $k = 3$ ) spline was used with  $s=2$ . as the  
807 smoothing condition in *splrep*.

808 **Acknowledgements** We acknowledge the discussion and assistance from all Liu Group members,  
809 Jane Salant, and Prof. Bence P. Ölveczky. We acknowledge the support from the Harvard  
810 University School of Engineering and Applied Sciences' Startup fund and Harvard University  
811 Faculty of Arts and Sciences' Dean's Competitive Fund for Promising Scholarship.

812 **Author contributions** J.L. and S.Z. conceived and designed the experiments. S.Z., R. L, J. Lee.  
813 fabricated and characterized the electrodes. S.Z., Z.L. performed the brain implantation, *in vivo*  
814 recording and histology study. S.Z., X.T., S.P. conducted the data analysis. The manuscript was  
815 written by J.L., S.Z., X.T., and S.P.

816 **Correspondence and requests for materials** should be addressed to J. L.  
817 ([jia\\_liu@seas.harvard.edu](mailto:jia_liu@seas.harvard.edu))



## 818 **References**

- 819 1 Gallego, J. A., Perich, M. G., Chowdhury, R. H., Solla, S. A. & Miller, L. E. Long-term  
820 stability of cortical population dynamics underlying consistent behavior. *Nat. Neurosci.* **23**,  
821 260-270 (2020).
- 822 2 Steinmetz, N. A. et al. Neuropixels 2.0: A miniaturized high-density probe for stable, long-  
823 term brain recordings. *Science* **372**, eabf4588 (2021).
- 824 3 Dhawale, A. K. et al. Automated long-term recording and analysis of neural activity in  
825 behaving animals. *eLife* **6**, e27702 (2017).
- 826 4 Schoonover, C. E., Ohashi, S. N., Axel, R. & Fink, A. J. P. Representational drift in primary  
827 olfactory cortex. *Nature* **594**, 541-546 (2021).
- 828 5 Igarashi, K. M., Lu, L., Colgin, L. L., Moser, M.-B. & Moser, E. I. Coordination of  
829 entorhinal–hippocampal ensemble activity during associative learning. *Nature* **510**, 143-  
830 147 (2014).
- 831 6 Dhawale, A. K., Wolff, S. B. E., Ko, R. & Ölveczky, B. P. The basal ganglia control the  
832 detailed kinematics of learned motor skills. *Nat. Neurosci.* **24**, 1256-1269 (2021).
- 833 7 Wang, M. et al. Neuronal basis of age-related working memory decline. *Nature* **476**, 210-  
834 213 (2011).
- 835 8 Grady, C. The cognitive neuroscience of ageing. *Nat. Rev. Neurosci.* **13**, 491-505 (2012).
- 836 9 Meng, G. et al. High-throughput synapse-resolving two-photon fluorescence  
837 microendoscopy for deep-brain volumetric imaging in vivo. *eLife* **8**, e40805 (2019).
- 838 10 Salatino, J. W., Ludwig, K. A., Kozai, T. D. Y. & Purcell, E. K. Glial responses to  
839 implanted electrodes in the brain. *Nat. Biomed. Eng.* **1**, 862-877 (2017).

- 840 11 Ji, N. The Practical and fundamental limits of optical imaging in mammalian brains.  
841 *Neuron* **83**, 1242-1245 (2014).
- 842 12 Yu, K. J. et al. Bioresorbable silicon electronics for transient spatiotemporal mapping of  
843 electrical activity from the cerebral cortex. *Nat. Mater.* **15**, 782-791 (2016).
- 844 13 Chiang, C.-H. et al. Development of a neural interface for high-definition, long-term  
845 recording in rodents and nonhuman primates. *Sci. Transl. Med.* **12**, eaay4682 (2020).
- 846 14 Song, E. et al. Flexible electronic/optoelectronic microsystems with scalable designs for  
847 chronic biointegration. *Proc. Natl. Acad. Sci.* **116**, 15398-15406 (2019).
- 848 15 Liu, Y. et al. Soft and elastic hydrogel-based microelectronics for localized low-voltage  
849 neuromodulation. *Nat. Biomed. Eng.* **3**, 58-68 (2019).
- 850 16 Yin, R. et al. Soft transparent graphene contact lens electrodes for conformal full-cornea  
851 recording of electroretinogram. *Nat. Commun.* **9**, 2334 (2018).
- 852 17 Zhang, J. et al. Stretchable transparent electrode arrays for simultaneous electrical and  
853 optical interrogation of neural circuits in vivo. *Nano Lett.* **18**, 2903-2911 (2018).
- 854 18 Liu, J. et al. Syringe-injectable electronics. *Nat. Nanotechnol.* **10**, 629-636 (2015).
- 855 19 Yang, X. et al. Bioinspired neuron-like electronics. *Nat. Mater.* **18**, 510-517 (2019).
- 856 20 Fu, T.-M. et al. Stable long-term chronic brain mapping at the single-neuron level. *Nat.*  
857 *Methods* **13**, 875-882 (2016).
- 858 21 Guan, S. et al. Elastocapillary self-assembled neurotassels for stable neural activity  
859 recordings. *Sci. Adv.* **5**, eaav2842 (2019).
- 860 22 Kim, T.-i. et al. Injectable, cellular-scale optoelectronics with applications for wireless  
861 optogenetics. *Science* **340**, 211-216 (2013).

- 862 23 Musk, E. An integrated brain-machine interface platform with thousands of channels. *J.*  
863 *Med. Internet. Res.* **21**,e16194 (2019)
- 864 24 He, F. et al. Multimodal mapping of neural activity and cerebral blood flow reveals long-  
865 lasting neurovascular dissociations after small-scale strokes. *Sci. Adv.* **6**, eaba1933 (2020).
- 866 25 Sharp, A. A., Ortega, A. M., Restrepo, D., Curran-Everett, D. & Gall, K. In vivo penetration  
867 mechanics and mechanical properties of mouse brain tissue at micrometer scales. *IEEE*  
868 *Trans. Biomed. Eng.* **56**, 45-53 (2008).
- 869 26 McInnes, L., Healy, J. & Melville, J. Umap: Uniform manifold approximation and  
870 projection for dimension reduction. Preprint at <https://arxiv.org/abs/1802.03426> (2018).
- 871 27 Liu, W. et al. A survey of deep neural network architectures and their applications.  
872 *Neurocomputing* **234**, 11-26 (2017).
- 873 28 Jeong, J.-W. et al. Wireless optofluidic systems for programmable in vivo pharmacology  
874 and optogenetics. *Cell* **162**, 662-674 (2015).
- 875 29 Seo, K. J. et al. Transparent, flexible, penetrating microelectrode arrays with capabilities  
876 of single-unit electrophysiology. *Adv. Biosyst.* **3**, 1800276 (2019).
- 877 30 Xie, C. et al. Three-dimensional macroporous nanoelectronic networks as minimally  
878 invasive brain probes. *Nat. Mater.* **14**, 1286-1292 (2015).
- 879 31 Kozai, T. D. Y. et al. Ultrasmall implantable composite microelectrodes with bioactive  
880 surfaces for chronic neural interfaces. *Nat. Mater.* **11**, 1065-1073 (2012).
- 881 32 Lu, L. et al. Soft and MRI compatible neural electrodes from carbon nanotube fibers. *Nano*  
882 *Lett.* **19**, 1577-1586 (2019).
- 883 33 Guitchounts, G., Markowitz, J. E., Liberti, W. A. & Gardner, T. J. A carbon-fiber electrode  
884 array for long-term neural recording. *J. Neural Eng.* **10**, 046016 (2013).

- 885 34 Rousche, P. J. et al. Flexible polyimide-based intracortical electrode arrays with bioactive  
886 capability. *IEEE Trans. Biomed. Eng.* **48**, 361-371 (2001).
- 887 35 Mineev, I. R. et al. Electronic dura mater for long-term multimodal neural interfaces.  
888 *Science* **347**, 159-163 (2015).
- 889 36 Airaghi Leccardi, M. J. I., Vagni, P. & Ghezzi, D. Multilayer 3D electrodes for neural  
890 implants. *J. Neural Eng.* **16**, 026013 (2019).
- 891 37 Barrese, J. C. et al. Failure mode analysis of silicon-based intracortical microelectrode  
892 arrays in non-human primates. *J. Neural Eng.* **10**, 066014 (2013).
- 893 38 Chaure, F. J., Rey, H. G. & Quiroga, R. Q. A novel and fully automatic spike-sorting  
894 implementation with variable number of features. *J. Neurophysiol.* **120**, 1859-1871 (2018).
- 895 39 Viswanathan, P. & Nieder, A. Visual receptive field heterogeneity and functional  
896 connectivity of adjacent neurons in primate frontoparietal association cortices. *J. Neurosci.*  
897 **37**, 8919-8928 (2017).
- 898 40 Jia, X. et al. High-density extracellular probes reveal dendritic backpropagation and  
899 facilitate neuron classification. *J. Neurophysiol.* **121**, 1831-1847 (2019).
- 900 41 Flurkey, K., M. Curren, J. & Harrison, D. E. *The Mouse in Biomedical Research Ch.20*  
901 (eds James G. Fox *et al.*) 637-672 (Academic Press, Burlington, 2007).
- 902 42 Zhao, S. et al. Full activation pattern mapping by simultaneous deep brain stimulation and  
903 fMRI with graphene fiber electrodes. *Nat. Commun.* **11**, 1788 (2020).
- 904 43 Schmitzer-Torbert, N., Jackson, J., Henze, D., Harris, K. & Redish, A. D. Quantitative  
905 measures of cluster quality for use in extracellular recordings. *Neuroscience* **131**, 1-11  
906 (2005).

907 44 Rousseeuw, P. J. Silhouettes: A graphical aid to the interpretation and validation of cluster  
908 analysis. *J. Comput. Appl. Math.* **20**, 53-65 (1987).

909 45 Wang, Q., Webber, R. M. & Stanley, G. B. Thalamic synchrony and the adaptive gating of  
910 information flow to cortex. *Nat. Neurosci.* **13**, 1534-1541 (2010).

911 46 Breiman, L. Random Forests. *Mach. Learn.* **45**, 5-32 (2001).

912 47 Cao, J. et al. The single-cell transcriptional landscape of mammalian organogenesis. *Nature*  
913 **566**, 496-502 (2019).

914 48 Zhao, S. et al. Graphene encapsulated copper microwires as highly MRI compatible neural  
915 electrodes. *Nano Lett.* **16**, 7731-7738 (2016).

916 49 Traag, V. A., Waltman, L. & van Eck, N. J. From Louvain to Leiden: guaranteeing well-  
917 connected communities. *Sci. Rep.* **9**, 5233 (2019).

918

919

920

921

922

923

924

925

926

927

## 928 Extended Data Figures

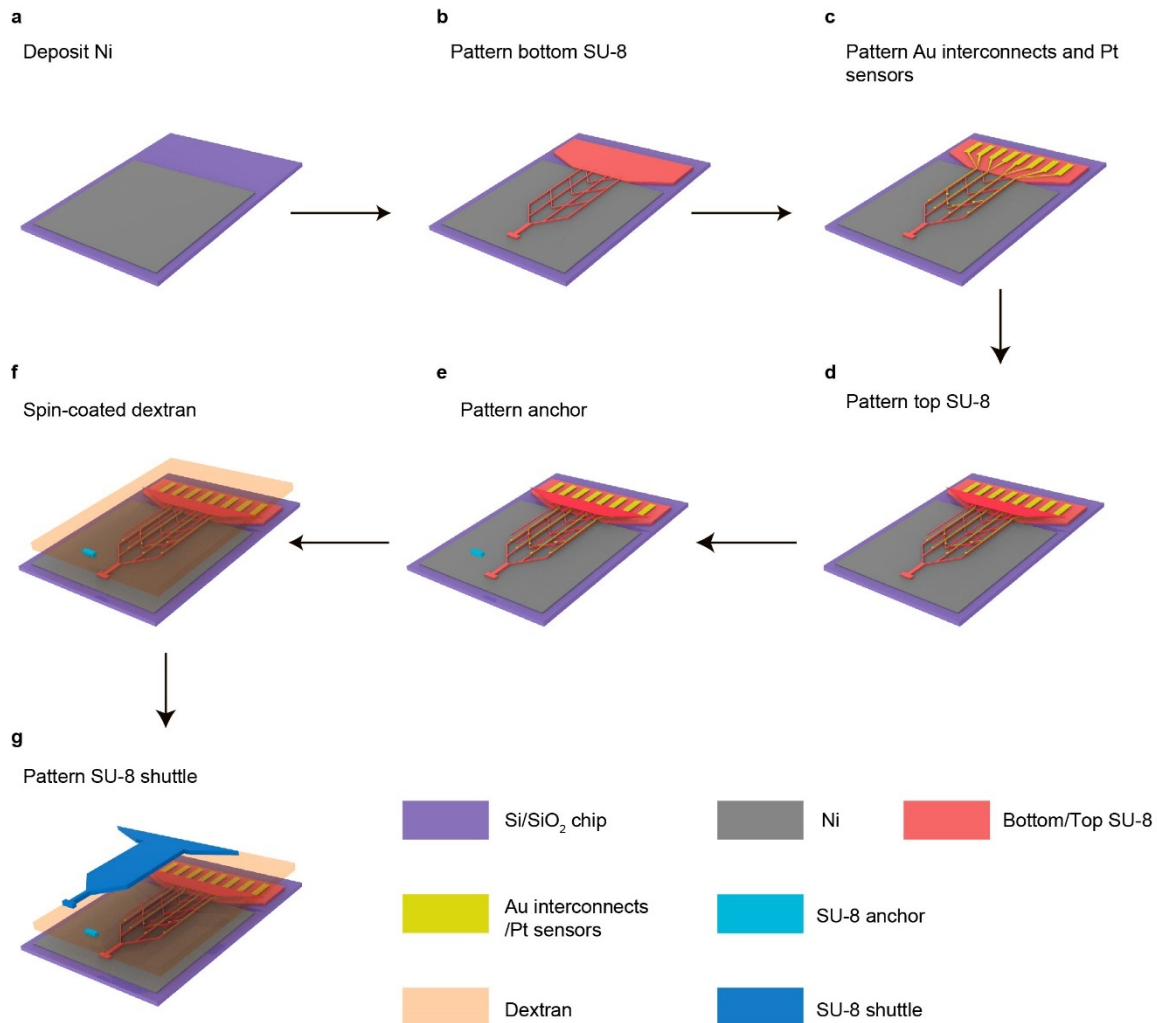

929  
930 **Extended Data Fig. 1 | Schematics show the stepwise fabrication of monolithically integrated**  
931 **tissue-level flexible mesh nanoelectronics. a,** A Ni sacrificial layer (grey) was defined by  
932 photolithography and deposited through thermal evaporation on the Si/SiO<sub>2</sub> wafer (purple). **b,** SU-  
933 8 2000.5 bottom passivation layer (red) was defined by photolithography. **c,** Cr/Au interconnects  
934 and Pt microelectrodes (yellow) were sequentially defined by photolithography and deposited  
935 through electron beam (e-beam) evaporation on the top of the SU-8 passivation layer. **d,** SU-8  
936 2000.5 top passivation was defined by photolithography (red). **e,** SU-8 2025 anchor was defined  
937 by photolithography (cyan). **f,** Dextran sacrificial layer (pink) was spin coated. **g,** SU-8 2025  
938 shuttle was defined by photolithography (navy).

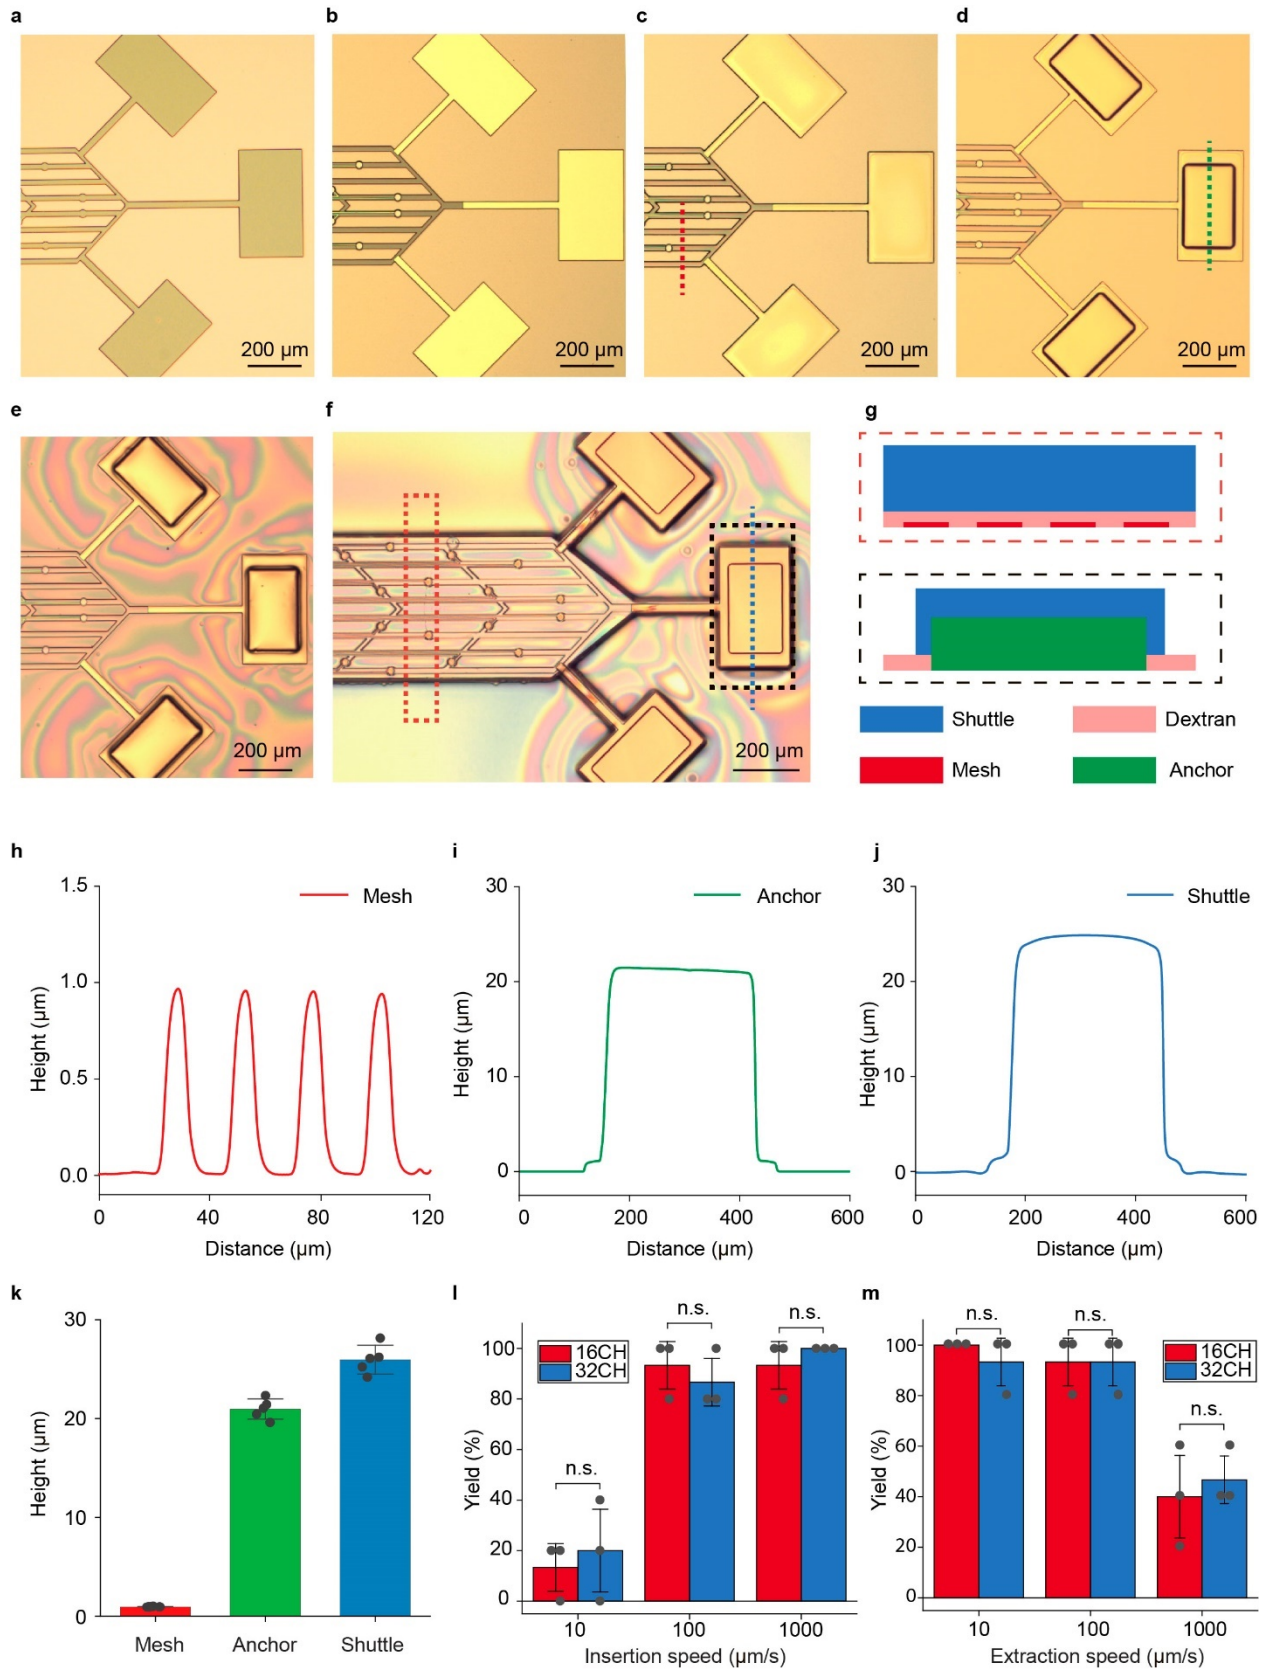

939



940 **Extended Data Fig. 2 | Anchor structures for controllable implantation. a-f**, Optical images  
941 illustrating each step of the fabrication corresponding with Extended Data Fig. 1b-g, respectively.  
942 **g**, Schematics showing the cross-section of the monolithically integrated mesh nanoelectronics at  
943 the red and black dashed boxes highlighted regions in **(f)**, respectively. **h-j**, Contact profilometer  
944 measurements along with the open mesh structure in **(c)**, red dashed line), anchor structure in **(d)**,  
945 green dashed line), and shuttle structure in **(f)**, blue dashed line). **k**, Statistical summary of the  
946 thickness of the open mesh, anchor, and shuttle layer structures ( $n = 5$ ). **l, m**, Insertion (**l**) and  
947 extraction (**m**) yield of 16-channel and 32-channel mesh nanoelectronics with different speeds (n.s.:  
948 not significant, two-tailed unpaired  $t$  test,  $n = 3$  times experiment, each time include 5  
949 insertion/extraction).



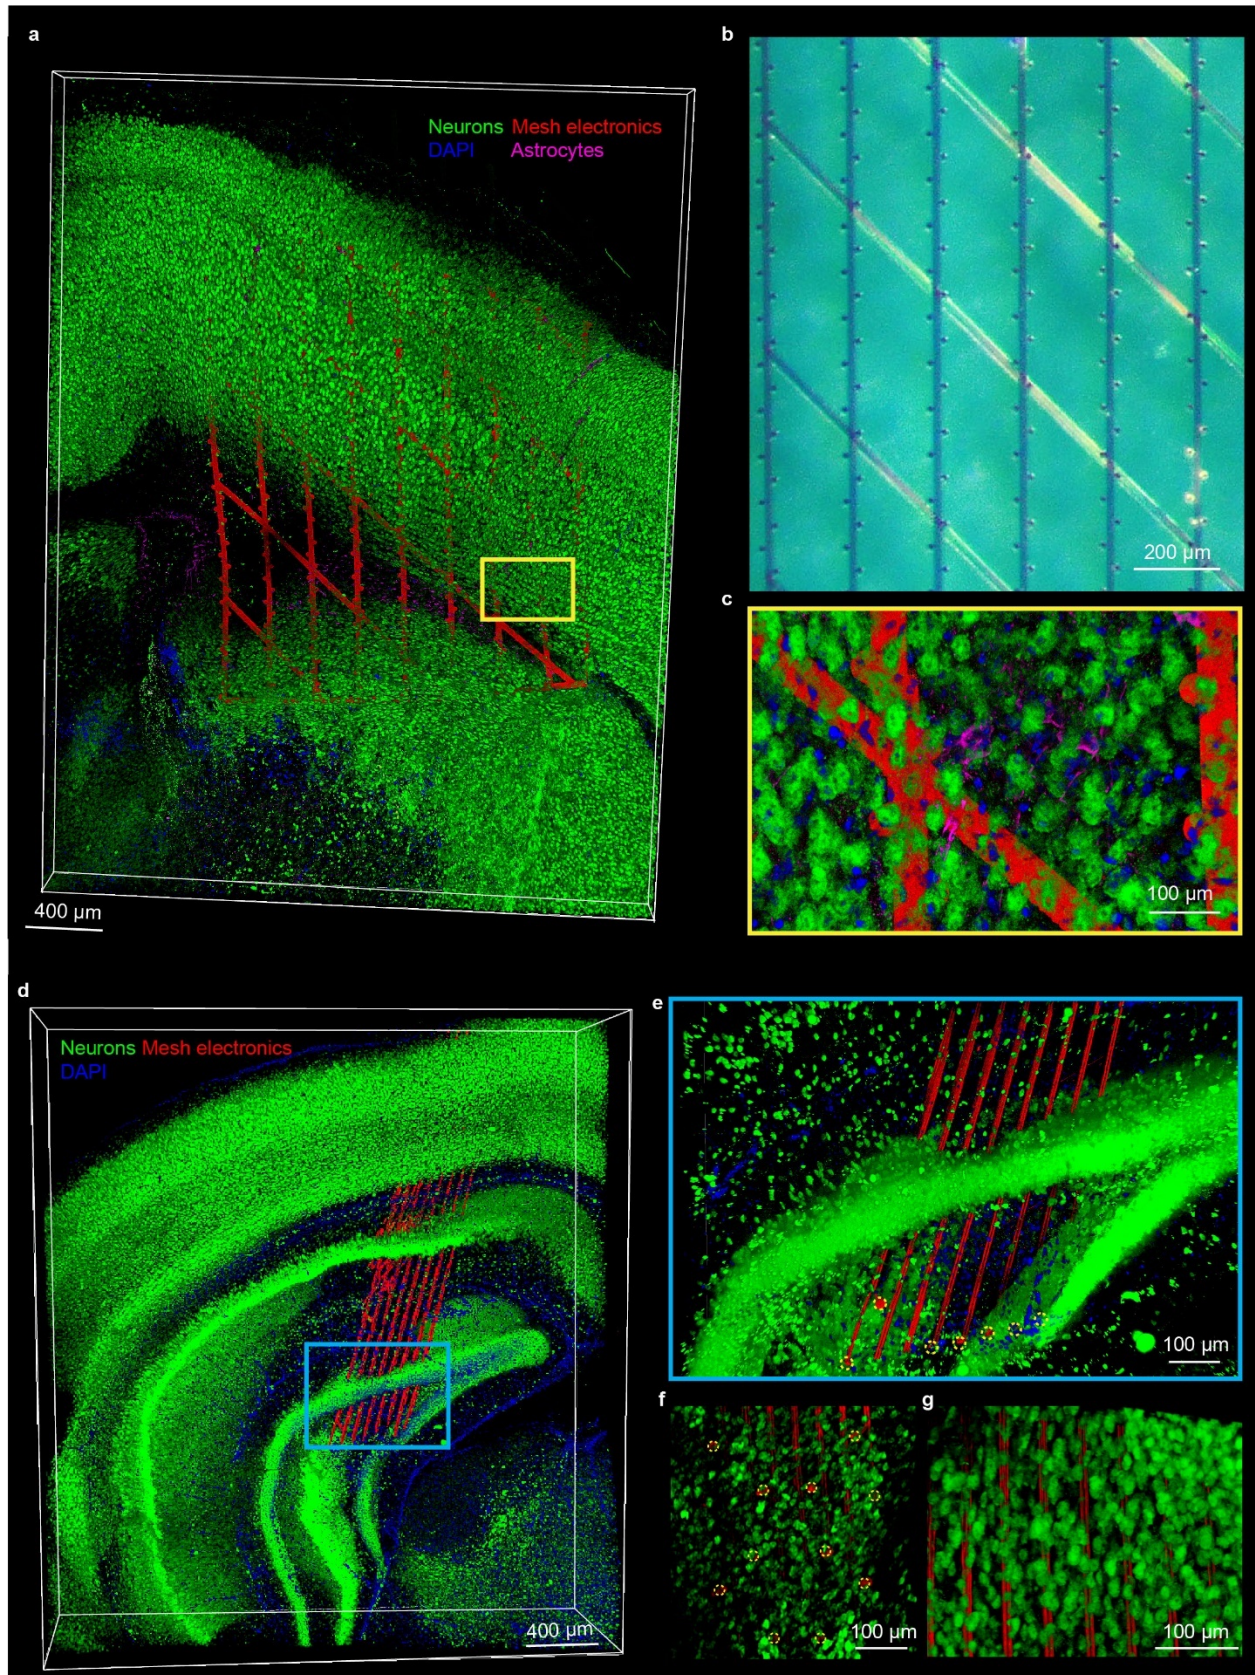

950

951 **Extended Data Fig. 3 | Independent replicates of mesh nanoelectronics with different sizes**  
952 **were implanted in mice brains. a,** 3D reconstructed confocal fluorescence imaging of neuron  
953 (green), nuclei (blue), and astrocytes (purple) with 1024-channel mesh nanoelectronics (red)  
954 sustaining their open mesh structure across multiple brain regions at 6-week post-implantation. **b,**  
955 Representative photograph illustrates the high density, 1024-channel mesh nanoelectronics. **c,**  
956 Zoom-in views of the regions highlighted by yellow (**c**) box in (**a**). **d,** A 3D reconstructed interface  
957 of neurons (green), nuclei (blue) with shape maintained 16-channel mesh electronic (red) at 6-  
958 week post-implantation. The mesh electronic was across the cortex and hippocampus with a  
959 designed 30-degree angle corresponding to the dorsal-ventral direction. **e,** A zoom-in view of the  
960 hippocampus region highlighted by the cyan box in (**a**). **f, g,** Neuron interpenetration inside the  
961 subcellular electrode, individual electrodes are indicated by yellow dashed circles in (**e**) and (**f**)  
962 and opening mesh structure (**g**). These results show neuron interpenetration inside the opening  
963 mesh and minimal astrocyte increases at the surface and interior of mesh, and thus demonstrate  
964 the reproducibility of these results in Fig. 2.  
965



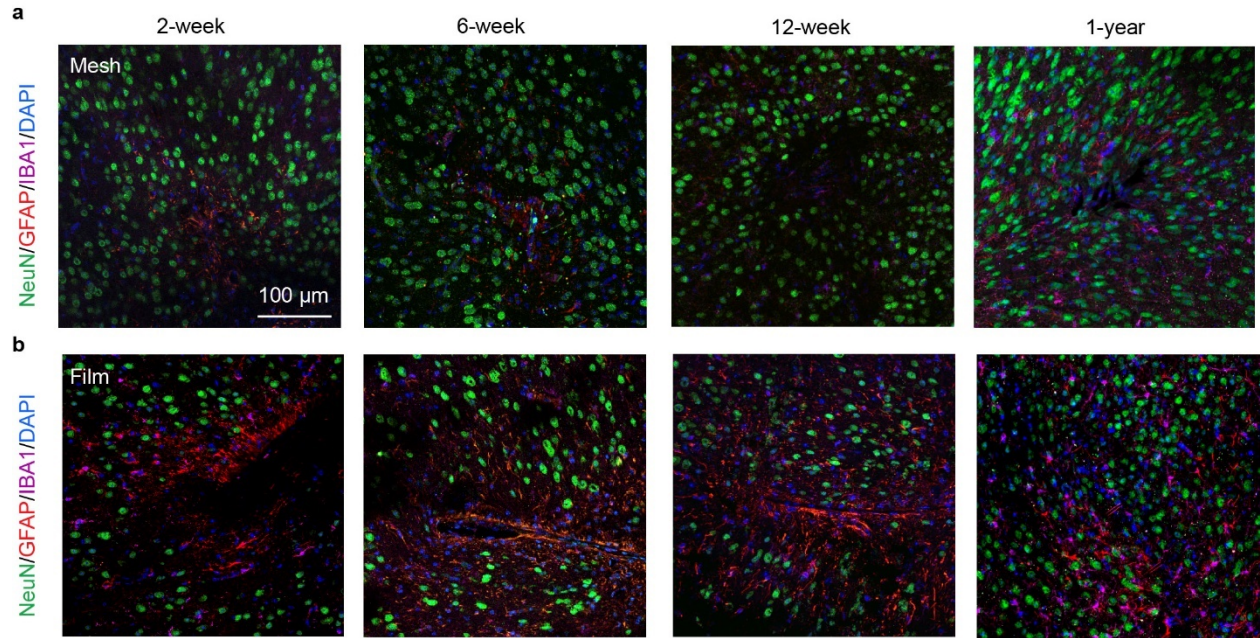

966

967 **Extended Data Fig. 4 | Time-dependent histology studies of brain tissue reaction to ~1 μm-**  
968 **thick open mesh/thin-film nanoelectronics. a, b,** Representative immunofluorescence images of  
969 brain tissue reaction following 2-week, 6-week, 12-week, and 1-year post-implantation of a mesh  
970 (a) and a thin-film (b) nanoelectronics from the contralateral hemisphere. The tissue was labeled  
971 for astrocytes (red), microglia (purple), neurons (green), and nuclei (blue). Time-dependent  
972 histology studies have been repeated on  $n = 5$  independent samples for each time point, with  
973 statistical analyses shown in Fig. 2f-i.

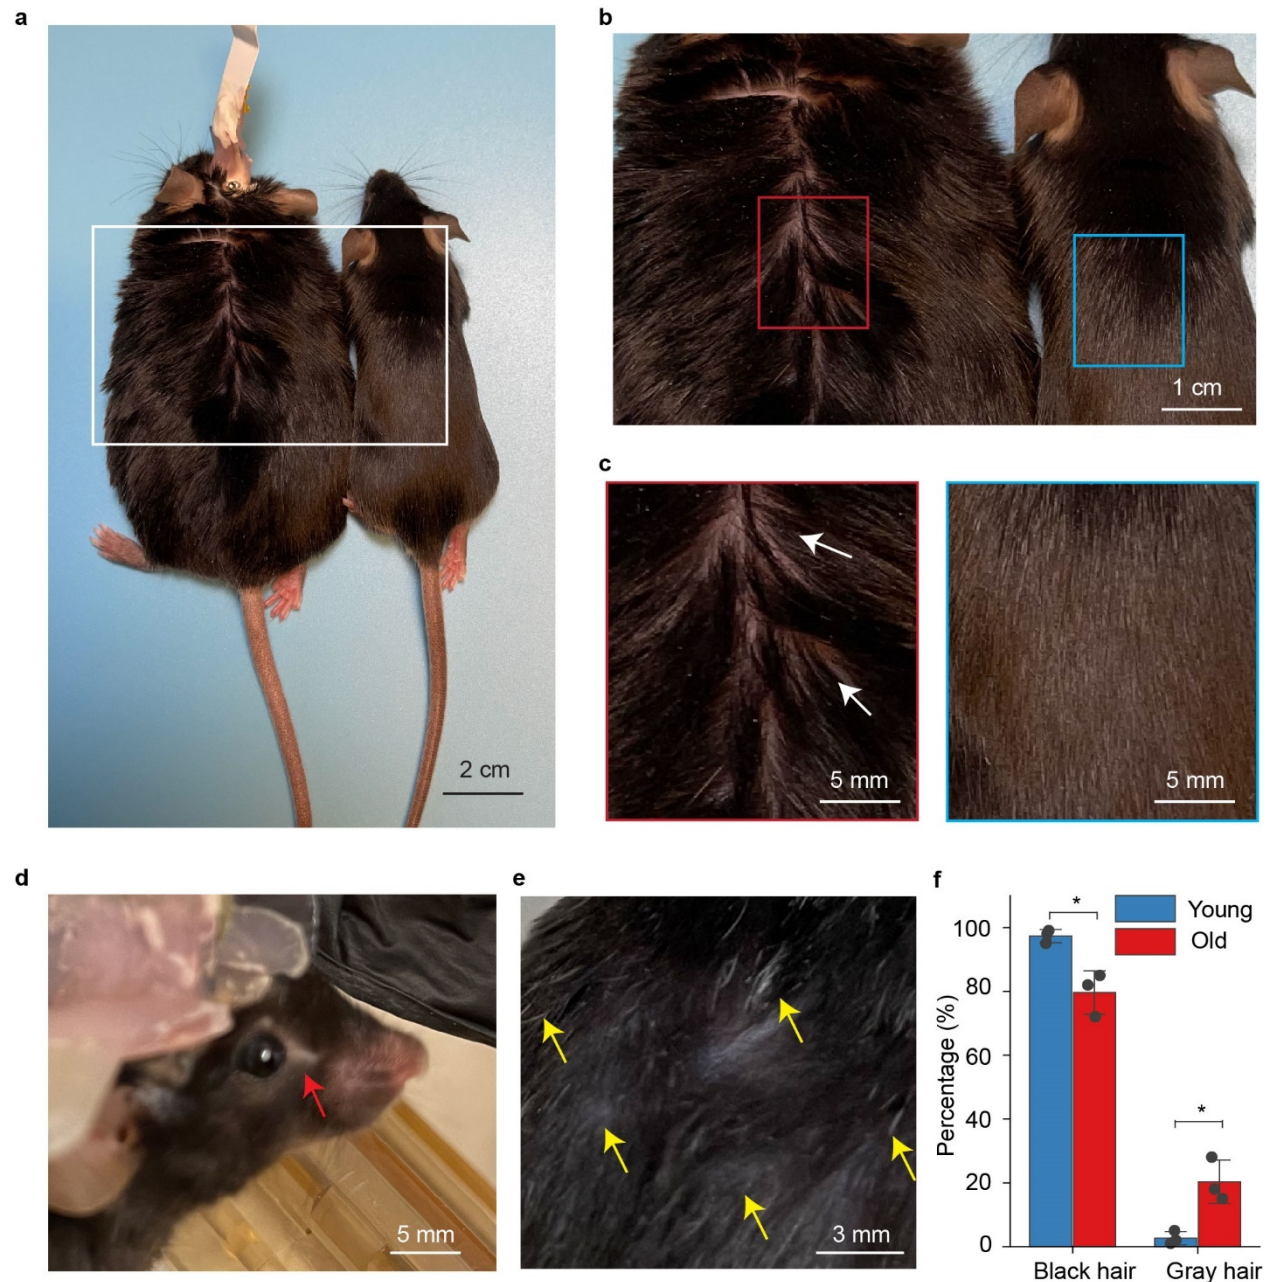

974

975 **Extended Data Fig. 5 | Aged mice characterization.** **a**, Representative photograph showing the  
976 old mouse of weight gain (18 months) with tissue-like mesh nanoelectronics implant (left)  
977 compared with the mature adult mouse (5 months, right). **b**, Zoom-in views of the regions  
978 highlighted by white boxes in (a). **c**, Zoom-in views of the thinning hair (white arrows) of aged  
979 mouse and glossy brown fur of mature adult mouse highlighted by red and blue boxes in (b). **d-e**,  
980 Representative photograph showing the barbering around eyes (**d**, red arrow), grey and thinning  
981 fur in the dorsal back skin (**e**, yellow arrows) of the aged mouse (18 months) with mesh  
982 nanoelectronics implant. Statistical analysis reveals that significantly increased gray hairs in dorsal  
983 back skin in old-aged mice ( $*p < 0.05$ , two-tailed unpaired  $t$  test,  $n = 3$ ).



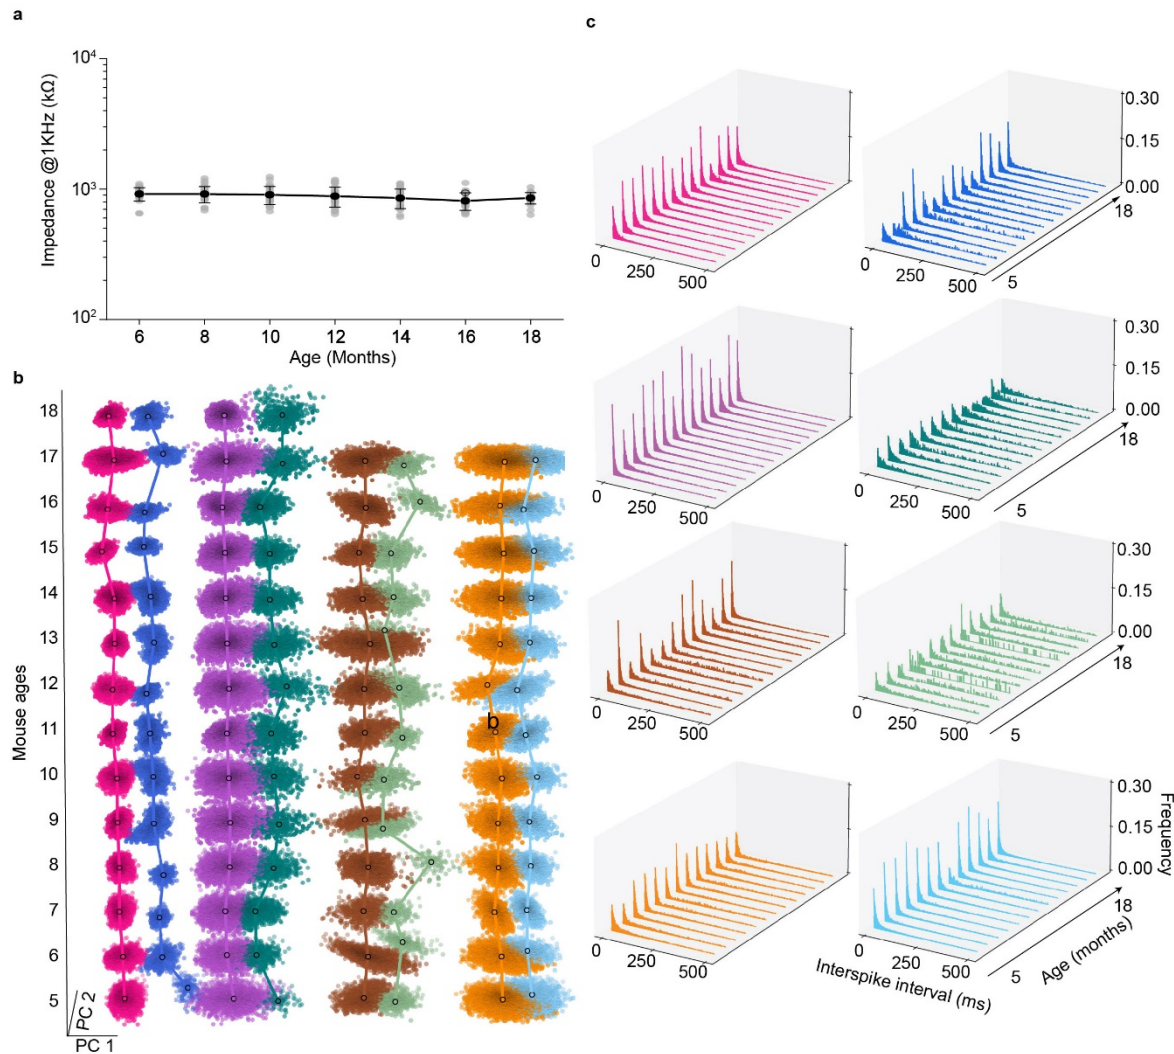

984

985 **Extended Data Fig. 6 | Long-term stable recording characterization.** **a**, Time-dependent  
986 electrode interfacial impedance at 1 kHz measured by the Cereplex Direct (Blackrock  
987 Microsystems, USA). Data represented mean  $\pm$  SD, individual data points are overlaid. The  
988 electrode interfacial impedances exhibited relatively constant values of  $920.2 \pm 107.2$  k $\Omega$  vs.  $857.2$   
989  $\pm 85.7$  k $\Omega$  (mean  $\pm$  SD,  $n = 30$ ) at months 6 vs.18. **b**, Time evolution of representative single-unit  
990 spikes clustered by *Leiden* clustering. The x- and y-axes denote the first and second PC  
991 dimensions, respectively, and the z-axis denotes mouse age in months. Dimension-reduced clusters associated  
992 with a single unit are shown (Fig. 4a) using the same color. These data show stable clusters with  
993 nearly constant positions in the first and second principal component plane (PC1-PC2) over the  
994 entire recording period from 5 months to 18 months. **c**, Time evolution of interspike interval (ISI)  
995 histograms of representative neurons identified in Fig. 4 from 5 months to 18 months. The x- and  
996 y-axes denote the time between subsequent action potentials of spontaneous firing neuron, and  
997 mouse age in months, respectively, and the z-axis denotes frequency. Bin size, 2 ms.  
998

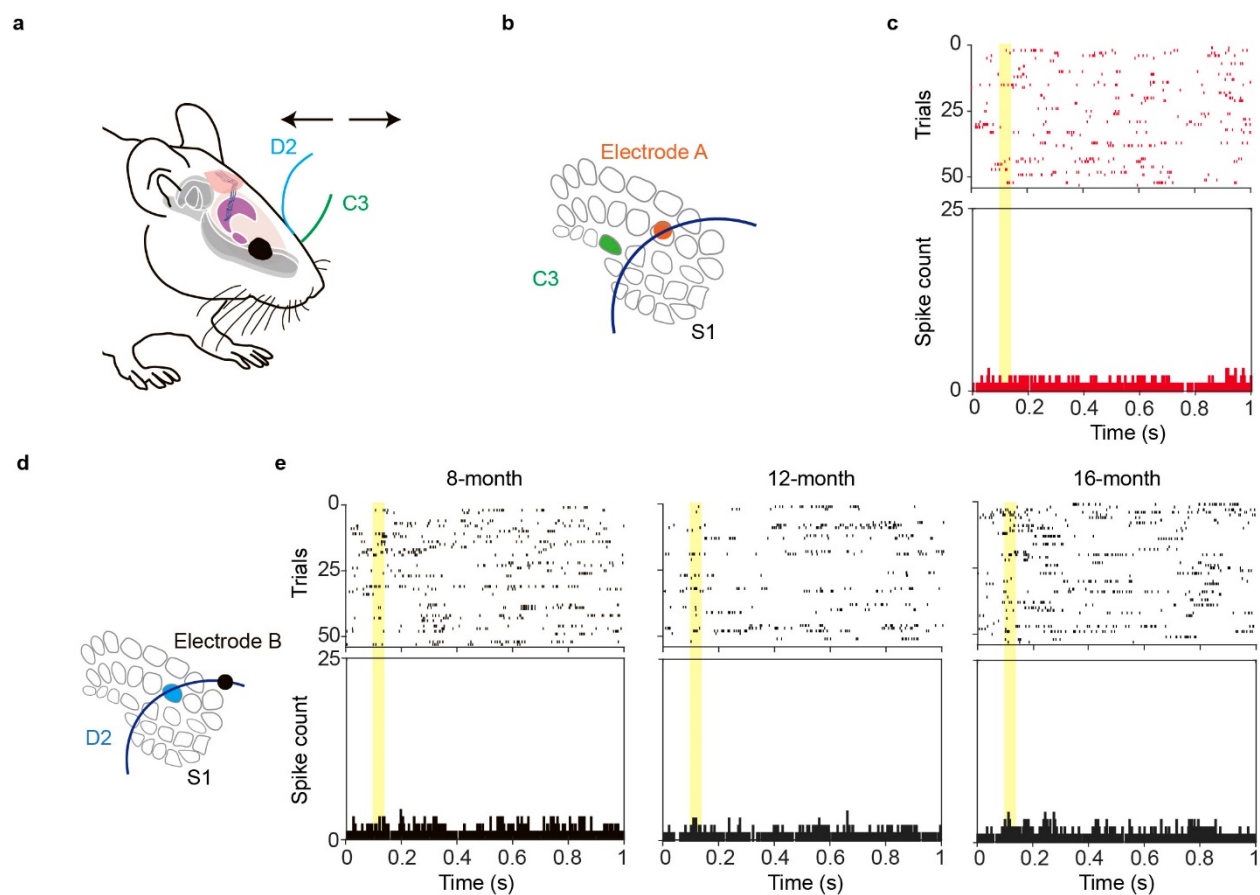

999

1000 **Extended Data Fig. 7 | Validation of whisker-related activity using sham stimulation.** **a**,  
1001 Schematic diagram of whisker deflection. Individual vibrissa was deflected in the rostral-caudal  
1002 plane using a computer-controlled piezoelectric bending actuator. D2 and C3 whiskers are labeled  
1003 in blue and green, respectively. **b**, Schematic diagram of whisker barrel and electrode arrangement  
1004 in S1. C3 whisker barrel and electrode A position is labeled in green and orange, respectively. **c**,  
1005 Raster plot and peri-stimulus time histogram (PSTH, 1 ms bin size) of electrode A show no  
1006 observable spiking activities when applied to the C3 whisker at 8 months. **d**, D2 whisker and  
1007 electrode B position are labeled in blue and black in S1 barrel field, respectively. **e**, Raster plot  
1008 and PSTH (1 ms bin size) of electrode B show no observable spiking activities when applied to  
1009 the D2 whisker from 8 months to 16 months.

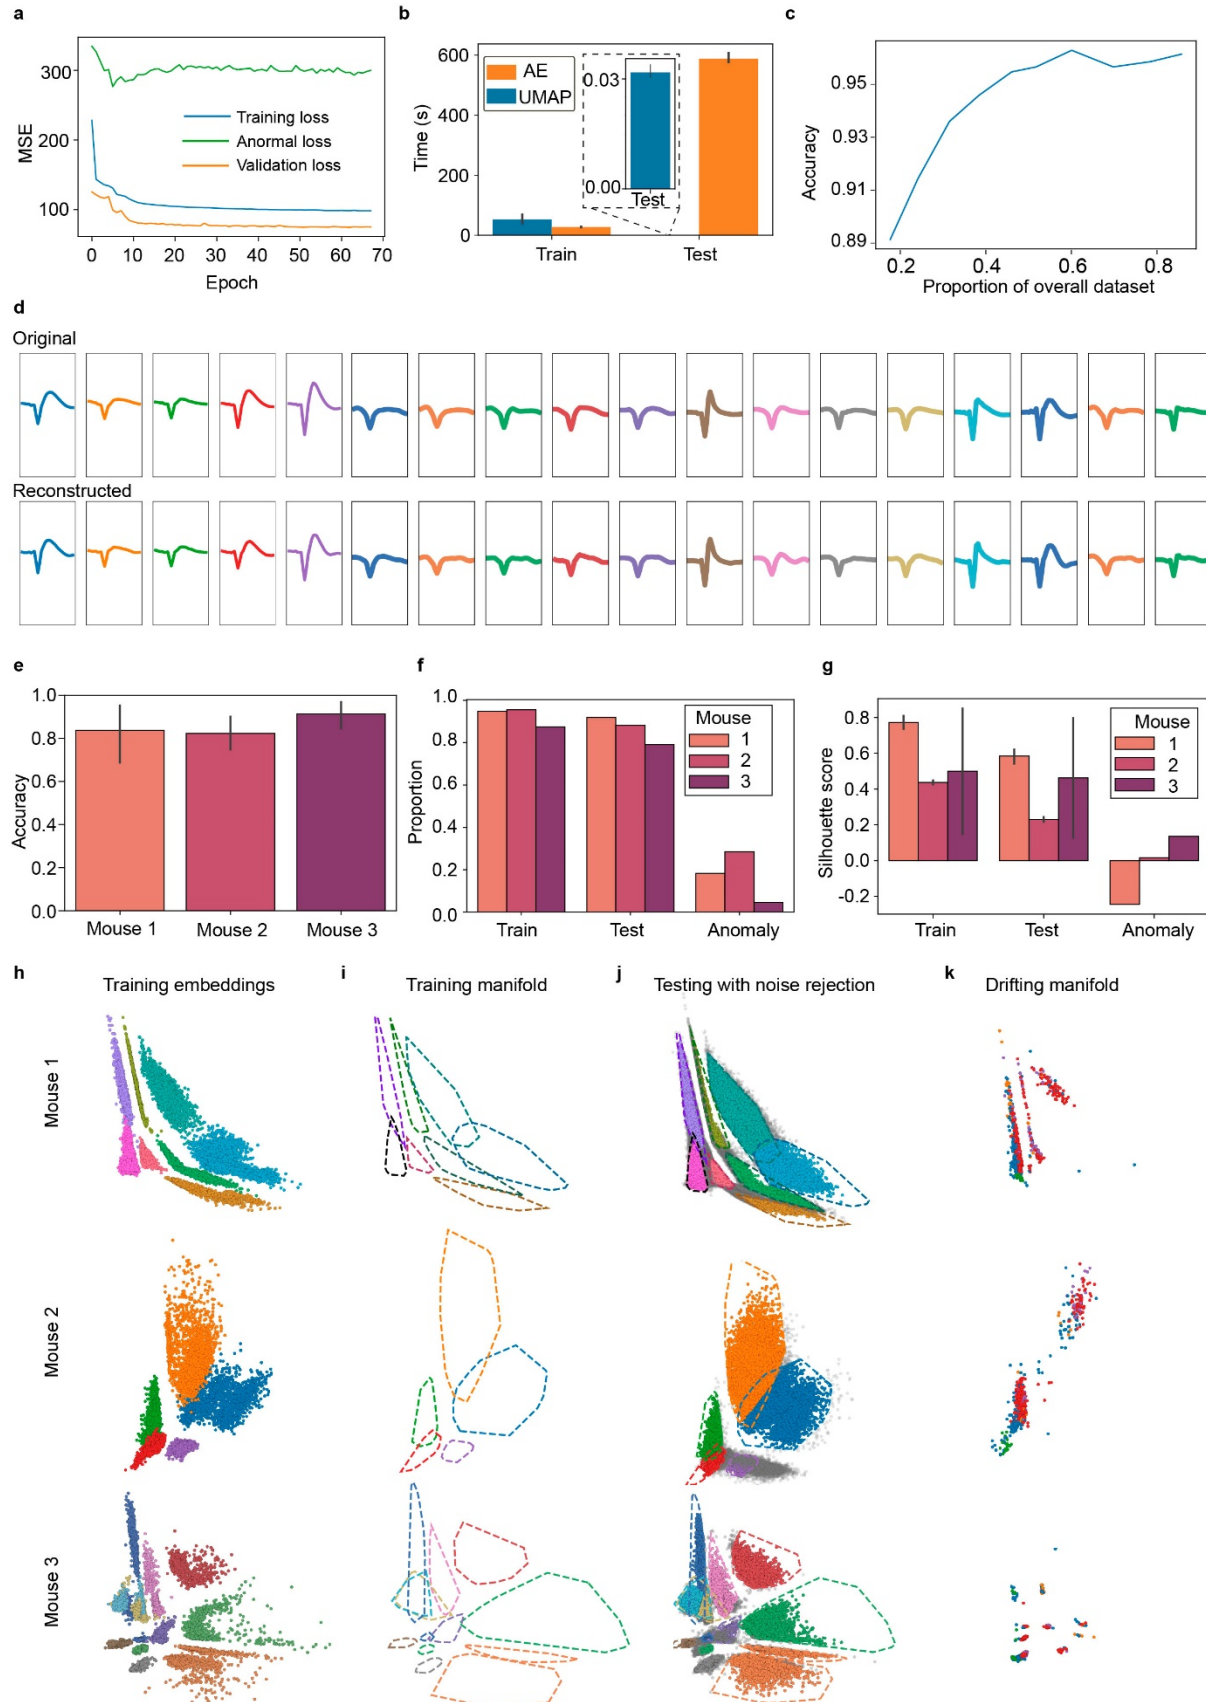

1011 **Extended Data Fig. 8 | Autoencoder-based spike sorting and stability analysis a,**  
1012 Representative training, validation, and drift loss curves obtained during the training process of  
1013 one of the autoencoders. **b,** Time performance comparison of autoencoder vs computational  
1014 pipeline allowing for dimensionality reduction and classification (UMAP and a Random Forest  
1015 classifier trained on UMAP embeddings). Tests were performed using a single CPU with Intel i5,  
1016 8 cores @ 4.1GHz. The autoencoder has a significant time advantage for inference. **c,** Overall  
1017 accuracy on the testing dataset as a function of the proportion of the overall dataset used for  
1018 training the network. **d,** Original and reconstructed average neuron waveforms for the second and  
1019 third mice data. Original waveforms on the top row are colored by within-mouse neuron labels  
1020 (the first 5 neurons from the left are from mouse 2) while reconstructed waveforms on the bottom  
1021 row are colored by autoencoder classifier predicted labels. Reconstruction and classification are  
1022 near-perfect. **e,** Bar plot of per-mouse classification accuracy calculated for each neuron label class.  
1023 **f,** Proportion of spikes kept for each dataset when using MSE-based thresholds for drift detection  
1024 (Fig. 5d). **g,** Silhouette score calculated using autoencoder embeddings of training, testing and drift  
1025 datasets with associated true neuron labels. The training and testing scores reflect the emergent  
1026 latent space cluster separability for observed neurons while the anomalous scores highlight the  
1027 poor separability of previously unseen embedded neuron waveforms. **h, i, j,** Stability verification  
1028 process illustrated for all three mice: visualizing training latent space embeddings (dots colored by  
1029 their true neuron label), calculating training manifold boundaries, and finally applying these  
1030 boundaries to quantify the proportion of testing dataset spikes latent embeddings lying inside the  
1031 predicted neuron's training manifold. **k,** Visualization of the latent embeddings of drift spikes.  
1032 Dots are colored by their true neuron labels; mixed colors within clusters showed poor ability to  
1033 separate different neurons from the drift dataset, in accordance with (g).



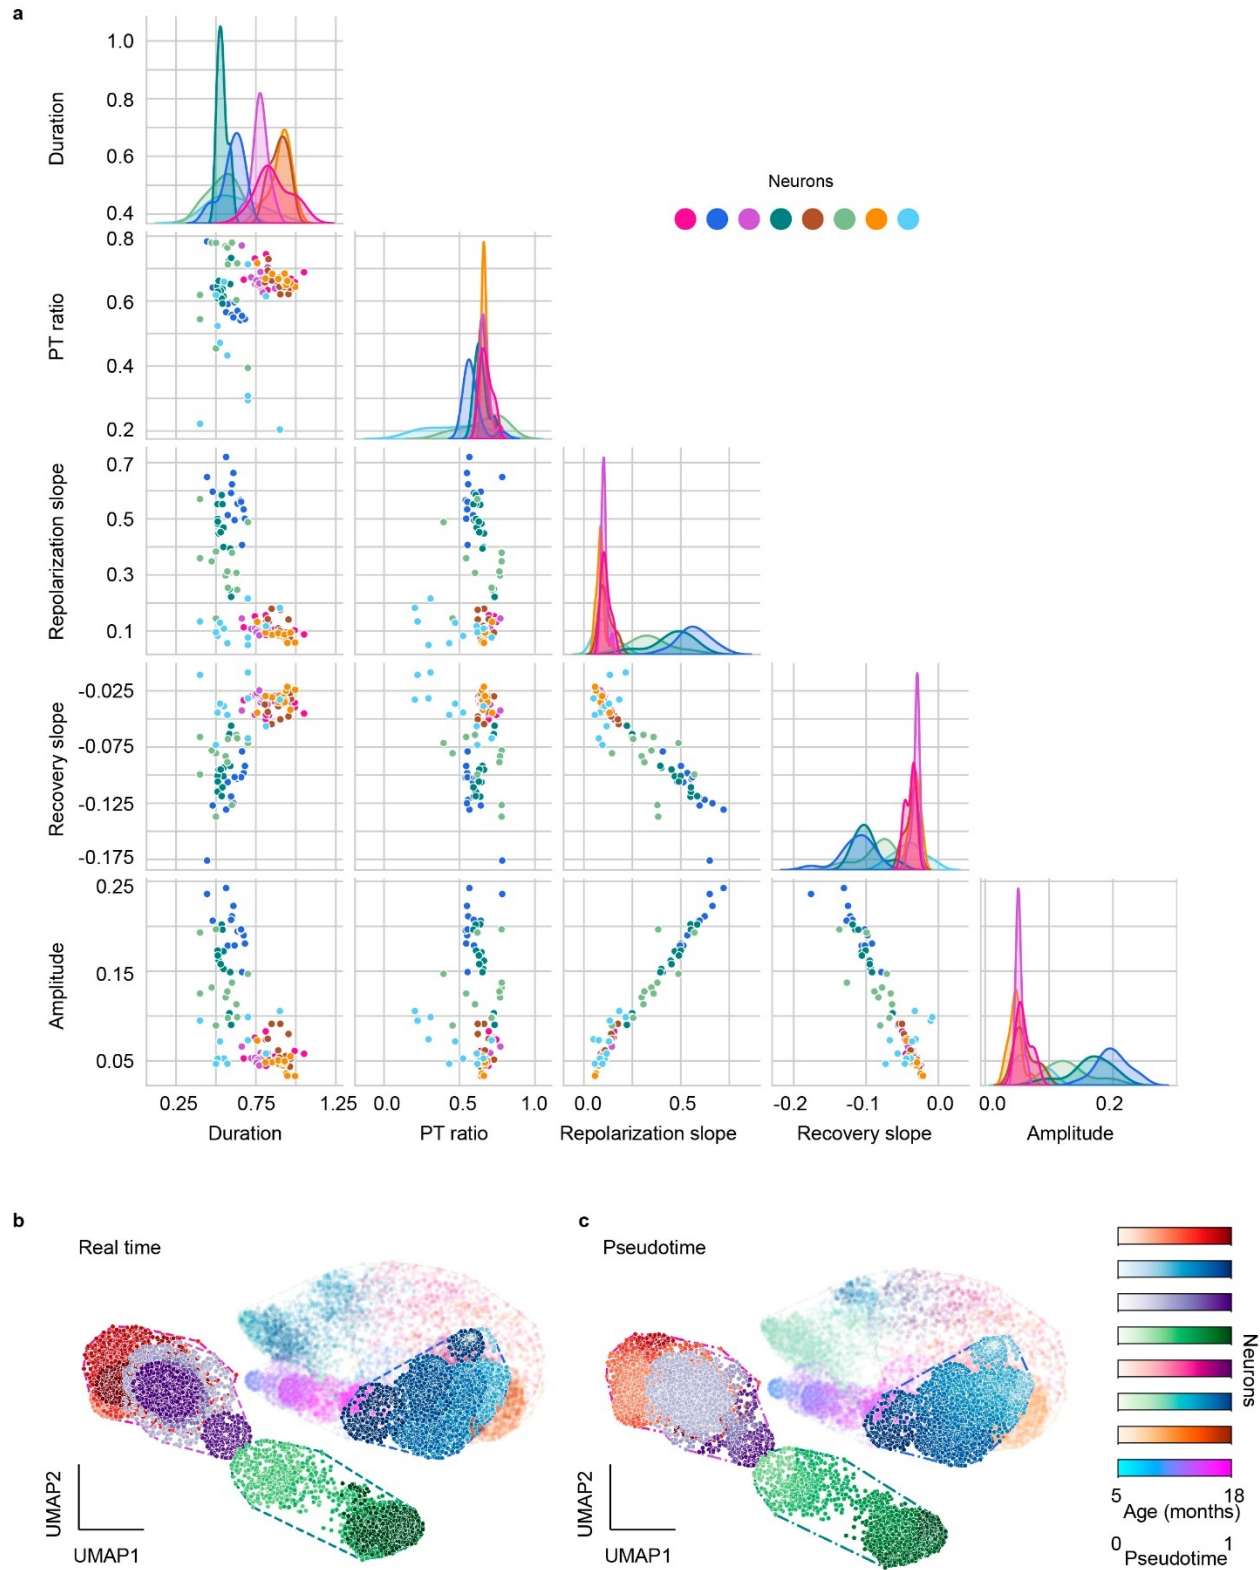

1034

1035 **Extended Data Fig. 9 | Feature selection and pseudo time analysis for potential aging-**  
1036 **associated analysis a**, Pairplot of 5 *AllenSDK* selected features shown in Fig. 4e-h. Dots represent  
1037 mean values of paired features calculated over neuron clusters over the entire recording period.  
1038 Diagonal subplots show neuron feature univariate distributions using kernel density estimators. **b**,  
1039 **c**, Real time (**b**) and pseudotime (**c**) comparison of UMAP embedding time-evolution for neurons  
1040 in Fig. 4. The x- and y axes denote the first and second UMAP dimensions, respectively. Each  
1041 gradient color-coded cluster represents a distinct neuron in Fig. 4. The color bars show the mouse  
1042 age time points from 5 to 18 months and the corresponding pseudo time from 0 to 1. Highlighted  
1043 dots correspond to the representative neurons used in the aging analysis of Fig. 6. Delimiting lines  
1044 are the convex hull of a neuron's UMAP embedding time-evolution.

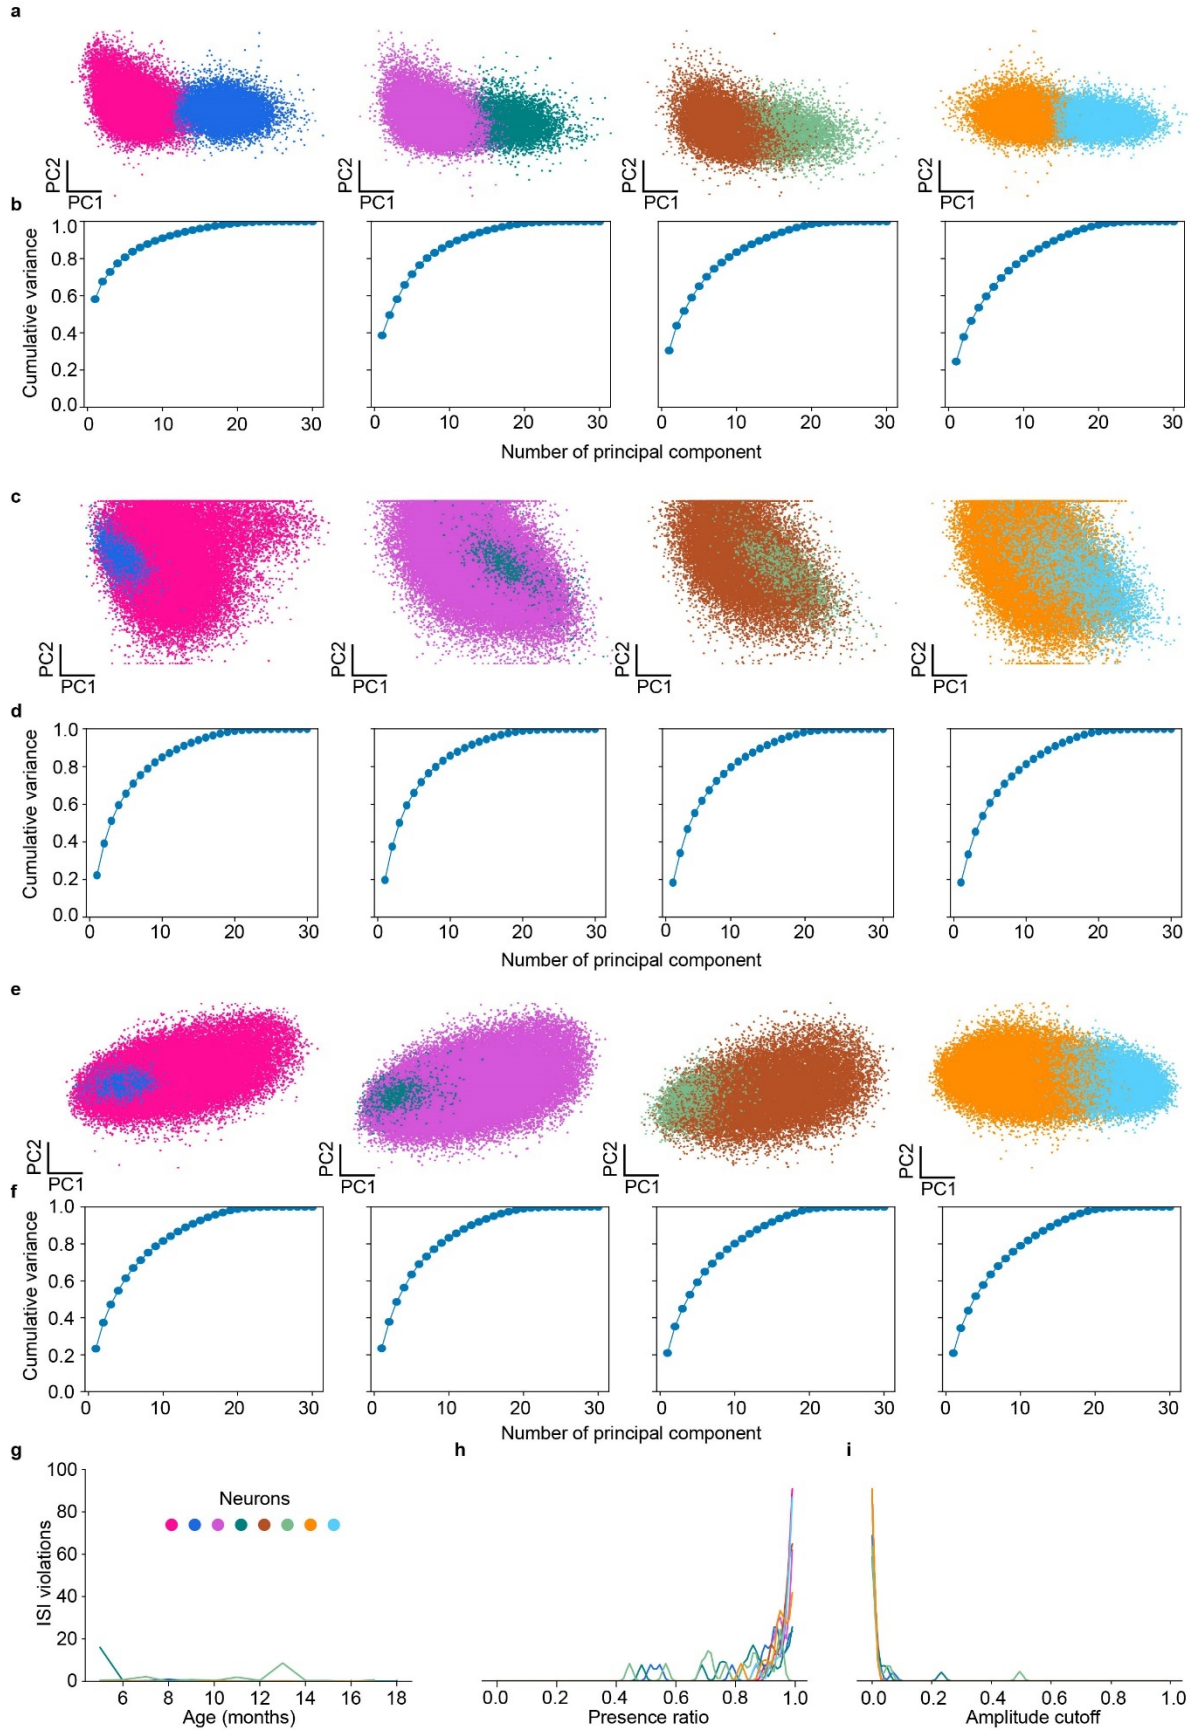

1046 **Extended Data Fig. 10 | Quality assessment for PCA embeddings and neuron clusters. a,**  
1047 **Principal Component (PC) embeddings of all recorded spikes without any normalization colored**  
1048 **by neuron. b, Cumulative proportion of variance explained by top principal components of (a). c,**  
1049 **d, Same as (a, b) with prior min-max normalization to scale spikes to (-1, 1) range. e, f, Same as**  
1050 **(a, b) with prior standard scaling normalization per spike. Normalization decreases cluster**  
1051 **separability in PC representation and lowers proportion of variance explained by the top two**  
1052 **components by removing amplitude information from spikes. g, Interspike interval (ISI) violations**  
1053 **in the absolute number of spikes calculated over all recordings for each recording month. h,**  
1054 **Presence ratio smoothed density plot over all recording sessions per unit. i, Amplitude cutoff**  
1055 **smoothed density plot over all recording sessions per unit.**
